# Supplementary material
Source: publisher site journal article supplement (https://www.dovepress.com/article/162045)
Supplement: Supplementary file 1 [file get_supplementary_file.php]

**Table S1** The publications identified during the literature search and the reason why it was rejected

| Reason           | Number | Sources    | Title                                                                                                                                                                                                                                                                                   |
|------------------|--------|------------|-----------------------------------------------------------------------------------------------------------------------------------------------------------------------------------------------------------------------------------------------------------------------------------------|
| Duplicated study | 1      | wos/pubmed | Ariga H. Common mechanisms of onset of cancer and neurodegenerative diseases. <i>Biological &amp; pharmaceutical bulletin</i> . 2015;38(6):795-808.                                                                                                                                     |
| Duplicated study | 2      | wos/pubmed | Ashley AK, Hanneman WH, Katoh T, et al. Analysis of targeted mutation in DJ-1 on cellular function in primary astrocytes. <i>Toxicology letters</i> . 2009;184(3):186-191.                                                                                                              |
| Duplicated study | 3      | wos/pubmed | Aslam K, Tsai CJ, Hazbun TR. The small heat shock protein Hsp31 cooperates with Hsp104 to modulate Sup35 prion aggregation. <i>Prion</i> . 2016;10(6):444-465.                                                                                                                          |
| Duplicated study | 4      | wos/pubmed | Baumunk D, Reichelt U, Hildebrandt J, et al. Expression parameters of the metabolic pathway genes pyruvate dehydrogenase kinase-1 (PDK-1) and DJ-1/PARK7 in renal cell carcinoma (RCC). <i>World journal of urology</i> . 2013;31(5):1191-1196.                                         |
| Duplicated study | 5      | CNKI/wf    | Bincai Pan GX, Songli Zhao. et al. Expression of DJ-I and mTOR in recurrence of benign meningiomas. <i>International Journal of Pathology and Clinical Medicine</i> . 2014(02):129-134.                                                                                                 |
| Duplicated study | 6      | wos/pubmed | Bindukumar B, Schwartz S, Aalinkeel R, Mahajan S, Lieberman A, Chadha K. Proteomic profiling of the effect of prostate-specific antigen on prostate cancer cells. <i>The Prostate</i> . 2008;68(14):1531-1545.                                                                          |
| Duplicated study | 7      | wos/pubmed | Butler GS, Dean RA, Tam EM, Overall CM. Pharmacoproteomics of a metalloproteinase hydroxamate inhibitor in breast cancer cells: dynamics of membrane type 1 matrix metalloproteinase-mediated membrane protein shedding. <i>Molecular and cellular biology</i> . 2008;28(15):4896-4914. |
| Duplicated study | 8      | wos/pubmed | Cao J, Lou S, Ying M, Yang B. DJ-1 as a human oncogene and potential therapeutic target. <i>Biochemical pharmacology</i> . 2015;93(3):241-250.                                                                                                                                          |
| Duplicated study | 9      | wos/pubmed | Cao J, Ying MD, Xie N, et al. The Oxidation States of DJ-1 Dictate the Cell Fate in Response to Oxidative Stress Triggered by 4-HPR: Autophagy or Apoptosis? <i>Antioxidants &amp; redox signaling</i> . 2014;21(10):1443-1459.                                                         |
| Duplicated study | 10     | CNKI/wf    | Cao Yin SX, Lijia Shen, et al. Detection of DJ-1 and PTEN in Oral Squamous Cell Carcinoma and Precancerous Lesions. <i>Journal of Dental Prevention &amp; Treatment</i> . 2011(11):563-567.                                                                                             |
| Duplicated study | 11     | wos/pubmed | Chan A, Diamandis EP, Blasutig IM. Strategies for discovering novel pancreatic cancer biomarkers. <i>Journal of proteomics</i> . 2013;81:126-134.                                                                                                                                       |
| Duplicated study | 12     | wos/pubmed | Chan JYH, Chan SHH. Activation of endogenous antioxidants as a common therapeutic strategy against cancer, neurodegeneration and cardiovascular diseases: A lesson learnt from DJ-1. <i>Pharmacology &amp; therapeutics</i> . 2015;156:69-74.                                           |

|                  |    |            |                                                                                                                                                                                                                                                                |
|------------------|----|------------|----------------------------------------------------------------------------------------------------------------------------------------------------------------------------------------------------------------------------------------------------------------|
| Duplicated study | 13 | CNKI/wf    | Chen Y. DJ-1, a novel biomarker and a selected target gene for overcoming chemoresistance in pancreatic cancer, zhejiang university; 2012.                                                                                                                     |
| Duplicated study | 14 | wos/pubmed | Chien CH, Lee MJ, Liou HC, Liou HH, Fu WM. Growth hormone is increased in the lungs and enhances experimental lung metastasis of melanoma in DJ-1 KO mice. BMC cancer. 2016;16(1):871.                                                                         |
| Duplicated study | 15 | wos/pubmed | Chien CH, Lee MJ, Liou HC, Liou HH, Fu WM. Local Immunosuppressive Microenvironment Enhances Migration of Melanoma Cells to Lungs in DJ-1 Knockout Mice. PloS one. 2015;10(2).                                                                                 |
| Duplicated study | 16 | wos/pubmed | Choi SK, Hong YO, Lee WM, et al. Overexpression of PI3K-p110alpha in the progression of uterine cervical neoplasia and its correlation with pAkt and DJ-1. European journal of gynaecological oncology. 2015;36(4):389-393.                                    |
| Duplicated study | 17 | CNKI/wf    | Dan Yu YL, Xiu Nie. Research progress of cancer gene PARK7/DJ-1 in tumor. Journal of Medical Research. 2016(05):6-9.                                                                                                                                           |
| Duplicated study | 18 | wos/pubmed | Das F, Dey N, Venkatesan B, Kasinath BS, Ghosh-Choudhury N, Choudhury GG. High glucose upregulation of early-onset Parkinson's disease protein DJ-1 integrates the PRAS40/TORC1 axis to mesangial cell hypertrophy. Cellular signalling. 2011;23(8):1311-1319. |
| Duplicated study | 19 | wos/pubmed | Davidson B, Hadar R, Schlossberg A, et al. Expression and clinical role of DJ-1, a negative regulator of PTEN, in ovarian carcinoma. Hum Pathol. 2008;39(1):87-95.                                                                                             |
| Duplicated study | 20 | CNKI/wf    | Deng W. Effect of DJ-1 on Proliferation, Apoptosis and Invasion of Ovarian Cancer SKOV3 Cells [Master], Nanchang University; 2015.                                                                                                                             |
| Duplicated study | 21 | CNKI/wf    | Deqing Fan HD, Ling Wang. Correlation between DJ-1 and PTEN expressions and clinical pathology of elderly patients with local advanced triple-negative breast cancer. Chinese Journal of Woman and Child Health Research. 2017(09):1130-1132.                  |
| Duplicated study | 22 | wos/pubmed | Duan X, Kelsen SG, Merali S. Proteomic analysis of oxidative stress-responsive proteins in human pneumocytes: insight into the regulation of DJ-1 expression. Journal of proteome research. 2008;7(11):4955-4961.                                              |
| Duplicated study | 23 | CNKI/wf    | Fang Mao. Jie Long HW, et al. Influence of RNA Interference Induced Silencing of DJ-1 Gene on Migration and Invasion Potential in Triple-Negative Breast Cancer Cells. Progress in Modern Biomedicine. 2014(07):1239-1242.                                     |
| Duplicated study | 24 | wos/pubmed | Fu K, Ren H, Wang Y, Fei E, Wang H, Wang G. DJ-1 inhibits TRAIL-induced apoptosis by blocking pro-caspase-8 recruitment to FADD. Oncogene. 2012;31(10):1311-1322.                                                                                              |
| Duplicated study | 25 | CNKI/wf    | Fu K. Parkinson's disease and cancer-associated protein DJ-1 inhibit TRAIL apoptosis signaling pathway. 2011.                                                                                                                                                  |

|                  |    |            |                                                                                                                                                                                                                                                                                                                     |
|------------------|----|------------|---------------------------------------------------------------------------------------------------------------------------------------------------------------------------------------------------------------------------------------------------------------------------------------------------------------------|
| Duplicated study | 26 | wos/pubmed | Gao X, Ning Y. CANCER AND PARKINSON'S DISEASE: THE ODD COUPLE. <i>Drugs of Today</i> . 2011;47(3):215-222.                                                                                                                                                                                                          |
| Duplicated study | 27 | wos/pubmed | Giusti L, Iacconi P, Ciregia F, et al. Fine-needle aspiration of thyroid nodules: Proteomic analysis to identify cancer biomarkers. <i>Journal of proteome research</i> . 2008;7(9):4079-4088.                                                                                                                      |
| Duplicated study | 28 | wos/pubmed | Grzmil M, Voigt S, Thelen P, Hemmerlein B, Helmke K, Burfeind P. Up-regulated expression of the MAT-8 gene in prostate cancer and its siRNA-mediated inhibition of expression induces a decrease in proliferation of human prostate carcinoma cells. <i>International journal of oncology</i> . 2004;24(1):97-105.  |
| Duplicated study | 29 | CNKI/wf    | Guanying Xiao SZ, Zhanmin Su, et al. The relationship between expressions of DJ-1 and PTEN in benign meningiomas relapse and evolution. <i>China Medical Engineering</i> . 2015(09):12-13+15.                                                                                                                       |
| Duplicated study | 30 | wos/pubmed | Han BB, Wang JW, Gao J, et al. DJ-1 as a potential biomarker for the early diagnosis in lung cancer patients. <i>Tumor Biology</i> . 2017;39(6):1-7.                                                                                                                                                                |
| Duplicated study | 31 | CNKI/wf    | Hao Yan WL, Jianjun Xu, et al. Protective effects of DJ-1 via antagonizing ROS-induced Beclin-1 up-regulation in hypoxia-reoxygenated HL-1 cardiomyocytes. <i>Basic &amp; Clinical Medicine</i> . 2013(06):763-768.                                                                                                 |
| Duplicated study | 32 | CNKI/wf    | Huang Y. Construction of Eukaryotic Expression Vector for DJ-1-shRNA and Its Effect on Transfected SGC7901 Gastric Cancer Cell Line DJ-1 [Master], Nanchang university; 2013.                                                                                                                                       |
| Duplicated study | 33 | wos/pubmed | He XY, Zheng Z, Li JF, et al. DJ-1 promotes invasion and metastasis of pancreatic cancer cells by activating SRC/ERK/uPA. <i>Carcinogenesis</i> . 2012;33(3):555-562.                                                                                                                                               |
| Duplicated study | 34 | wos/pubmed | Hinkle DA, Mullett SJ, Gabris BE, Hamilton RL. DJ-1 expression in glioblastomas shows positive correlation with p53 expression and negative correlation with epidermal growth factor receptor amplification. <i>Neuropathology : official journal of the Japanese Society of Neuropathology</i> . 2011;31(1):29-37. |
| Duplicated study | 35 | wos/pubmed | Hod Y. Differential control of apoptogis by DJ-1 in prostate benign and cancer cells. <i>Journal of cellular biochemistry</i> . 2004;92(6):1221-1233.                                                                                                                                                               |
| Duplicated study | 36 | wos/pubmed | Huai Q, Sun Y, Wang H, et al. Crystal structure of DJ-1/RS and implication on familial Parkinson's disease. <i>FEBS letters</i> . 2003;549(1-3):171-175.                                                                                                                                                            |
| Duplicated study | 37 | wos/pubmed | Hudson TS, Hartle DK, Hursting SD, et al. Inhibition of prostate cancer growth by muscadine grape skin extract and resveratrol through distinct mechanisms. <i>Cancer research</i> . 2007;67(17):8396-8405.                                                                                                         |

|                  |    |            |                                                                                                                                                                                                                            |
|------------------|----|------------|----------------------------------------------------------------------------------------------------------------------------------------------------------------------------------------------------------------------------|
| Duplicated study | 38 | wos/pubmed | Inzelberg R, Jankovic J. Are Parkinson disease patients protected from some but not all cancers? <i>Neurology</i> . 2007;69(15):1542-1550.                                                                                 |
| Duplicated study | 39 | wos/pubmed | Ismail IA, Kang HS, Lee HJ, Kim JK, Hong SH. DJ-1 upregulates breast cancer cell invasion by repressing KLF17 expression. <i>British journal of cancer</i> . 2014;110(5):1298-1306.                                        |
| Duplicated study | 40 | wos/pubmed | Ismail IA, Kang HS, Lee HJ, Kwon BM, Hong SH. 2'-Benzoyloxycinnamaldehyde-mediated DJ-1 upregulation protects MCF-7 cells from mitochondrial damage. <i>Biological &amp; pharmaceutical bulletin</i> . 2012;35(6):895-902. |
| Duplicated study | 41 | CNKI/wf    | Jie He WW, Qianjin Liao, et al. The Signal Transduction-Associated Protein in HL-60 Cell Induced by DADS. <i>JOURNAL OF NANHUA UNIVERSITY(MEDICAL EDITION)</i> . 2007(4):477-480.                                          |
| Duplicated study | 42 | CNKI/wf    | Jin Z. Investigate expression effect and its significance of oncogene DJ-1 in thyroid carcinoma. <i>World Latest Medicine Information</i> . 2015(32):11-12.                                                                |
| Duplicated study | 43 | CNKI/wf    | Jing Chen HW, Hui Cheng, et al. The value of combined detection of tumor markers DJ-1, NSE, CYFRA21-1 and CEA in diagnosis of lung cancer. <i>International Journal of Laboratory Medicine</i> . 2013(6):651-652,655.      |
| Duplicated study | 44 | CNKI/wf    | Jinjin Yan KS, Qizhou Zhu. The correlation between DJ-1 and tumor. <i>GUANGDONG MEDICAL JOURNAL</i> . 2011(23):3147-3149.                                                                                                  |
| Duplicated study | 45 | CNKI/wf    | Jinzhang Chen WH, Dayong Zheng, et al. The Role of DJ-1 Gene in the Development of Lung Cancer. <i>The Practical Journal of Cancer</i> . 2015(3):317-319.                                                                  |
| Duplicated study | 46 | CNKI/wf    | Juan wang YY, Jin Qin, et al. Diallyl Disulfide down regulated DJ-1 inhibiting ability of proliferation and inducing human leukemic cell differentiation. <i>Chinese Pharmacological Bulletin</i> . 2015(03):416-420.      |
| Duplicated study | 47 | wos/pubmed | Junn E, Jang WH, Zhao X, Jeong BS, Mouradian MM. Mitochondrial localization of DJ-1 leads to enhanced neuroprotection. <i>Journal of neuroscience research</i> . 2009;87(1):123-129.                                       |
| Duplicated study | 48 | wos/pubmed | Kahle PJ, Waak J, Gasser T. DJ-1 and prevention of oxidative stress in Parkinson's disease and other age-related disorders. <i>Free radical biology &amp; medicine</i> . 2009;47(10):1354-1361.                            |
| Duplicated study | 49 | wos/pubmed | Kapoor S. DJ-1 and its emerging role as a biomarker of systemic malignancies besides lung carcinomas. <i>Molecular biology reports</i> . 2013;40(2):1529-1529.                                                             |
| Duplicated study | 50 | wos/pubmed | Kawate T, Iwaya K, Koshikawa K, et al. High levels of DJ-1 protein and isoelectric point 6.3 isoform in sera of breast cancer patients. <i>Cancer Sci</i> . 2015;106(7):938-943.                                           |

|                  |    |            |                                                                                                                                                                                                                                                             |
|------------------|----|------------|-------------------------------------------------------------------------------------------------------------------------------------------------------------------------------------------------------------------------------------------------------------|
| Duplicated study | 51 | wos/pubmed | Kawate T. DJ-1 as a predictor of pathologic complete remission of neoadjuvant chemotherapy with breast cancer patients. <i>Journal of Clinical Oncology</i> . 2012;30(15).                                                                                  |
| Duplicated study | 52 | wos/pubmed | Kim DK, Beaven MA, Kulinski JM, et al. Regulation of Reactive Oxygen Species and the Antioxidant Protein DJ-1 in Mastocytosis. <i>PLoS one</i> . 2016;11(9).                                                                                                |
| Duplicated study | 53 | wos/pubmed | Kim RH, Mak TW. Tumours and tremors: how PTEN regulation underlies both. <i>British journal of cancer</i> . 2006;94(5):620-624.                                                                                                                             |
| Duplicated study | 54 | wos/pubmed | Kim RH, Peters M, Jang YJ, et al. DJ-1, a novel regulator of the tumor suppressor PTEN. <i>Cancer cell</i> . 2005;7(3):263-273.                                                                                                                             |
| Duplicated study | 55 | wos/pubmed | Kim YC, Kitaura H, Iguchi-Ariga SM, Ariga H. DJ-1, an oncogene and causative gene for familial Parkinson's disease, is essential for SV40 transformation in mouse fibroblasts through up-regulation of c-Myc. <i>FEBS letters</i> . 2010;584(18):3891-3895. |
| Duplicated study | 56 | wos/pubmed | Kim YC, Kitaura H, Taira T, Iguchi-Ariga SM, Ariga H. Oxidation of DJ-1-dependent cell transformation through direct binding of DJ-1 to PTEN. <i>International journal of oncology</i> . 2009;35(6):1331-1341.                                              |
| Duplicated study | 57 | wos/pubmed | Knobbe CB, Revett TJ, Bai Y, et al. Choice of biological source material supersedes oxidative stress in its influence on DJ-1 in vivo interactions with Hsp90. <i>Journal of proteome research</i> . 2011;10(10):4388-4404.                                 |
| Duplicated study | 58 | wos/pubmed | Kolisek M, Montezano AC, Sponder G, et al. PARK7/DJ-1 dysregulation by oxidative stress leads to magnesium deficiency: implications in degenerative and chronic diseases. <i>Clinical Science</i> . 2015;129(12):1143-1150.                                 |
| Duplicated study | 59 | wos/pubmed | Lei Y, Huang K, Gao C, et al. Proteomics identification of ITGB3 as a key regulator in reactive oxygen species-induced migration and invasion of colorectal cancer cells. <i>Molecular &amp; cellular proteomics : MCP</i> . 2011;10(10):M110.005397.       |
| Duplicated study | 60 | CNKI/wf    | Li Sen LW. The correlation of DJ-1 and HSP27 expression and clinicopathological features in triple negative breast cancer. <i>Journal of Modern Oncology</i> . 2013;21(06):1231-1234.                                                                       |
| Duplicated study | 61 | wos/pubmed | Li Y, Cui J, Zhang CH, et al. High-expression of DJ-1 and loss of PTEN associated with tumor metastasis and correlated with poor prognosis of gastric carcinoma. <i>International journal of medical sciences</i> . 2013;10(12):1689-1697.                  |
| Duplicated study | 62 | CNKI/wf    | Lisi You BY, Xiaoyan Chen. Expression of DJ-1 in pancreatic cancer and its clinical significance. <i>Oncology Progress</i> . 2017(2):152-155.                                                                                                               |
| Duplicated study | 63 | wos/pubmed | Liu H, Wang M, Li M, et al. Expression and role of DJ-1 in leukemia. <i>Biochemical and biophysical research communications</i> . 2008;375(3):477-483.                                                                                                      |

|                  |    |            |                                                                                                                                                                                                                                                                                                                        |
|------------------|----|------------|------------------------------------------------------------------------------------------------------------------------------------------------------------------------------------------------------------------------------------------------------------------------------------------------------------------------|
| Duplicated study | 64 | wos/pubmed | Liu S, Yang Z, Wei H, et al. Increased DJ-1 and its prognostic significance in hepatocellular carcinoma. <i>Hepato-gastroenterology</i> . 2010;57(102-103):1247-1256.                                                                                                                                                  |
| Duplicated study | 65 | CNKI/wf    | Liu S. The Role and Mechanism of Oncogene DJ-1 in Human Hepatocellular Carcinoma. 2011.                                                                                                                                                                                                                                |
| Duplicated study | 66 | CNKI/wf    | Mao Fang JL, Hongyan Wang,Zeping Weng. DJ-1 inhibits PTEN expression and increases AR in metastasis of non-hormone-dependent breast cancer. <i>China Journal of Modern Medicine</i> . 2014(14):32-37.                                                                                                                  |
| Duplicated study | 67 | wos/pubmed | McNally RS, Davis BK, Clements CM, Accavitti-Loper MA, Mak TW, Ting JPY. DJ-1 Enhances Cell Survival through the Binding of Cezanne, a Negative Regulator of NF-kappa B. <i>Journal of Biological Chemistry</i> . 2011;286(6):4098-4106.                                                                               |
| Duplicated study | 68 | wos/pubmed | Melle C, Ernst G, Escher N, et al. Protein profiling of microdissected pancreas carcinoma and identification of HSP27 as a potential serum marker. <i>Clinical chemistry</i> . 2007;53(4):629-635.                                                                                                                     |
| Duplicated study | 69 | wos/pubmed | Merikallio H, Paakko P, Kinnula VL, Harju T, Soini Y. Nuclear factor erythroid-derived 2-like 2 (Nrf2) and DJ1 are prognostic factors in lung cancer. <i>Hum Pathol</i> . 2012;43(4):577-584.                                                                                                                          |
| Duplicated study | 70 | CNKI/wf    | Min Song ML, Chengping Hu, et al. Inhibitory Effect of RNA Interference DJ-1 Gene on Lung Adenocarcinoma A549 Cells 2011; wuhan.                                                                                                                                                                                       |
| Duplicated study | 71 | wos/pubmed | Morelli M, Scumaci D, Di Cello A, et al. DJ-1 in Endometrial Cancer A Possible Biomarker to Improve Differential Diagnosis Between Subtypes. <i>International Journal of Gynecological Cancer</i> . 2014;24(4):649-658.                                                                                                |
| Duplicated study | 72 | wos/pubmed | Niki T, Takahashi-Niki K, Taira T, Iguchi-Ariga SM, Ariga H. DJBP: a novel DJ-1-binding protein, negatively regulates the androgen receptor by recruiting histone deacetylase complex, and DJ-1 antagonizes this inhibition by abrogation of this complex. <i>Molecular cancer research : MCR</i> . 2003;1(4):247-261. |
| Duplicated study | 73 | wos/pubmed | Pardo M, Garcia A, Thomas B, et al. The characterization of the invasion phenotype of uveal melanoma tumour cells shows the presence of MUC18 and HMG-1 metastasis markers and leads to the identification of DJ-1 as a potential serum biomarker. <i>International journal of cancer</i> . 2006;119(5):1014-1022.     |
| Duplicated study | 74 | wos/pubmed | Pei XJ, Wu TT, Li B, Tian XY, Li Z, Yang QX. Increased expression of macrophage migration inhibitory factor and DJ-1 contribute to cell invasion and metastasis of nasopharyngeal carcinoma. <i>International journal of medical sciences</i> . 2014;11(1):106-115.                                                    |
| Duplicated study | 75 | wos/pubmed | Pitkanen-Arsiola T, Tillman JE, Gu G, et al. Androgen and anti-androgen treatment modulates androgen receptor activity and DJ-1 stability. <i>The Prostate</i> . 2006;66(11):1177-1193.                                                                                                                                |

|                  |    |            |                                                                                                                                                                                                                                                                                           |
|------------------|----|------------|-------------------------------------------------------------------------------------------------------------------------------------------------------------------------------------------------------------------------------------------------------------------------------------------|
| Duplicated study | 76 | wos/pubmed | Qiu B, Wang J, Yu Y, et al. DJ-1 promotes development of DEN-induced hepatocellular carcinoma and proliferation of liver cancer cells. <i>Oncotarget</i> . 2017;8(5):8499-8511.                                                                                                           |
| Duplicated study | 77 | CNKI/wf    | Ran Liu WW, Hui Tan. A review of DJ-1 antioxidant effects in Parkinson's disease and tumors. <i>Journal of Clinical and Pathology</i> . 2016(03):314-321.                                                                                                                                 |
| Duplicated study | 78 | CNKI/wf    | Ren H. Study on the Function of Parkinson's Disease and Cancer Related Protein DJ-1 in Autophagy and Mitochondria. 2010.                                                                                                                                                                  |
| Duplicated study | 79 | wos/pubmed | Richarme G, Marguet E, Forterre P, Ishino S, Ishino Y. DJ-1 family Maillard deglycases prevent acrylamide formation. <i>Biochemical and biophysical research communications</i> . 2016;478(3):1111-1116.                                                                                  |
| Duplicated study | 80 | wos/pubmed | Robert G, Puissant A, Dufies M, et al. The caspase 6 derived N-terminal fragment of DJ-1 promotes apoptosis via increased ROS production. <i>Cell death and differentiation</i> . 2012;19(11):1769-1778.                                                                                  |
| Duplicated study | 81 | wos/pubmed | Saidu NE, Noe G, Cerles O, et al. Dimethyl Fumarate Controls the NRF2/DJ-1 Axis in Cancer Cells: Therapeutic Applications. <i>Molecular cancer therapeutics</i> . 2017;16(3):529-539.                                                                                                     |
| Duplicated study | 82 | wos/pubmed | Sajjad MU, Green EW, Miller-Fleming L, et al. DJ-1 modulates aggregation and pathogenesis in models of Huntington's disease. <i>Human molecular genetics</i> . 2014;23(3):755-766.                                                                                                        |
| Duplicated study | 83 | wos/pubmed | Schumann C, Taratula O, Khalimonchuk O, et al. ROS-induced nanotherapeutic approach for ovarian cancer treatment based on the combinatorial effect of photodynamic therapy and DJ-1 gene suppression. <i>Nanomedicine : nanotechnology, biology, and medicine</i> . 2015;11(8):1961-1970. |
| Duplicated study | 84 | wos/pubmed | Sekito A, Taira T, Niki T, Iguchi-Arigo SM, Arigo H. Stimulation of transforming activity of DJ-1 by Abstrakt, a DJ-1-binding protein. <i>International journal of oncology</i> . 2005;26(3):685-689.                                                                                     |
| Duplicated study | 85 | wos/pubmed | Shen Z, Jiang Z, Ye D, Xiao B, Zhang X, Guo J. Growth inhibitory effects of DJ-1-small interfering RNA on laryngeal carcinoma Hep-2 cells. <i>Medical oncology (Northwood, London, England)</i> . 2011;28(2):601-607.                                                                     |
| Duplicated study | 86 | wos/pubmed | Tillman JE, Yuan J, Gu G, et al. DJ-1 binds androgen receptor directly and mediates its activity in hormonally treated prostate cancer cells. <i>Cancer research</i> . 2007;67(10):4630-4637.                                                                                             |
| Duplicated study | 87 | wos/pubmed | Trivedi R, Dihazi GH, Eltoweissy M, Mishra DP, Mueller GA, Dihazi H. The antioxidant protein PARK7 plays an important role in cell resistance to Cisplatin-induced apoptosis in case of clear cell renal cell carcinoma. <i>European journal of pharmacology</i> . 2016;784:99-110.       |
| Duplicated study | 88 | wos/pubmed | Tsiaousidou A, Lambropoulou M, Chatzitheoklitos E, et al. B7H4, HSP27 and DJ-1 molecular markers as prognostic factors in pancreatic cancer. <i>Pancreatology : official journal of the International Association of Pancreatology (IAP) [et al]</i> . 2013;13(6):564-569.                |

|                  |     |            |                                                                                                                                                                                                                                                                                                                                                |
|------------------|-----|------------|------------------------------------------------------------------------------------------------------------------------------------------------------------------------------------------------------------------------------------------------------------------------------------------------------------------------------------------------|
| Duplicated study | 89  | wos/pubmed | van der Brug MP, Blackinton J, Chandran J, et al. RNA binding activity of the recessive parkinsonism protein DJ-1 supports involvement in multiple cellular pathways. <i>Proceedings of the National Academy of Sciences of the United States of America</i> . 2008;105(29):10244-10249.                                                       |
| Duplicated study | 90  | wos/pubmed | Vasseur S, Afzal S, Tardivel-Lacombe J, Park DS, Iovanna JL, Mak TW. DJ-1/PARK7 is an important mediator of hypoxia-induced cellular responses. <i>Proceedings of the National Academy of Sciences of the United States of America</i> . 2009;106(4):1111-1116.                                                                                |
| Duplicated study | 91  | wos/pubmed | Wang B, Qin H, Wang Y, et al. Effect of DJ-1 overexpression on the proliferation, apoptosis, invasion and migration of laryngeal squamous cell carcinoma SNU-46 cells through PI3K/AKT/mTOR. <i>Oncology reports</i> . 2014;32(3):1108-1116.                                                                                                   |
| Duplicated study | 92  | wos/pubmed | Wang H, Gao WW. DJ-1 Expression in Cervical Carcinoma and its Effects on Cell Viability and Apoptosis. <i>Medical Science Monitor</i> . 2016;22.                                                                                                                                                                                               |
| Duplicated study | 93  | CNKI/wf    | Wang J. Role of DJ-1 gene in tumors. <i>Journal of International Pathology and Clinical Medicine</i> . 2011(6):527-530.                                                                                                                                                                                                                        |
| Duplicated study | 94  | CNKI/wf    | Xiaoqing Lai ZL, Fan Zhang. Expression of DJ-1 and HSP27 Proteins in Epithelial Ovarian Cancer and Their Correlation with Tumor Invasion and Metastasis. <i>Modern diagnosis and treatment</i> . 2016(07):1314-1315.                                                                                                                           |
| Duplicated study | 95  | wos/pubmed | Xu S, Ma D, Zhuang R, et al. DJ-1 Is Upregulated in Oral Squamous Cell Carcinoma and Promotes Oral Cancer Cell Proliferation and Invasion. <i>Journal of Cancer</i> . 2016;7(8):1020-1028.                                                                                                                                                     |
| Duplicated study | 96  | CNKI/wf    | Xu Y. The Expression and Role of Oncogene DJ-1 in Gastric Cancer Stem Cells. 2015.                                                                                                                                                                                                                                                             |
| Duplicated study | 97  | CNKI/wf    | Xueping Feng ZC, Zhiqiang Xiao, et al Over Expression of NM23-H1、 DJ1 and TIM1 in Poor Differential Nasopharyngeal Carcinoma Tissues and CNE2 Cell Line. <i>PROGRESS IN BIOCHEMISTRY AND BIOPHYSICS</i> . 2005(4):338-346.                                                                                                                     |
| Duplicated study | 98  | wos/pubmed | Yamane T, Yamamoto Y, Nakano Y, Nakagaki T, Ohkubo I, Ariga H. Expression and protease activity of mouse legumain are regulated by the oncogene/transcription co-activator, DJ-1 through p53 and cleavage of annexin A2 is increased in DJ-1-knockout cells. <i>Biochemical and biophysical research communications</i> . 2015;467(3):472-477. |
| Duplicated study | 99  | CNKI/wf    | Yang LX ZL, Zhang TB. The clinical significance of DJ-1 over expression in pancreatic neuroendocrine neoplasms. <i>CHINA ONCOLOGY</i> 2015(02):112-118.                                                                                                                                                                                        |
| Duplicated study | 100 | wos/pubmed | Zhang D, Lim SG, Koay ES. Proteomic identification of down-regulation of oncoprotein DJ-1 and proteasome activator subunit 1 in hepatitis B virus-infected well-differentiated hepatocellular carcinoma. <i>International journal of oncology</i> . 2007;31(3):577-584.                                                                        |
| Duplicated study | 101 | wos/pubmed | Zhang HJ, Siu MK, Jiang LL, Mak VC, Ngan HY, Cheung AN. Overexpression of the Parkinson disease protein DJ-1 and its regulator PTEN in                                                                                                                                                                                                         |



|                  |     |            |                                                                                                                                                                                                                                                                                                          |
|------------------|-----|------------|----------------------------------------------------------------------------------------------------------------------------------------------------------------------------------------------------------------------------------------------------------------------------------------------------------|
| study            |     |            | gestational trophoblastic disease. International journal of gynecological pathology : official journal of the International Society of Gynecological Pathologists. 2010;29(5):468-475.                                                                                                                   |
| Duplicated study | 102 | CNKI/wf    | Zhisen Shen HD, Dong Ye, et al. Effect of DJ-1 silencing by RNA interference on growth of xenografted human laryngeal squamous cell carcinoma Hep-2 cells in nude mice. Journal of Zhejiang University (Medical Science). 2016(4):349-355.                                                               |
| Duplicated study | 103 | CNKI/wf    | Zhiying Zeng JZ, Qunfeng Zhang, et al. Elevated serum level of D J-1 in malignant ovarian tumor and its clinical significance. Progress in Obstetrics and Gynecology. 2016(6):429-432,436.                                                                                                               |
| Duplicated study | 104 | CNKI/wf    | Zhou B. Clinical Pathological Features and Prognostic Analysis of Pancreatic Neuroendocrine Tumors, zhejiang university; 2016.                                                                                                                                                                           |
| Duplicated study | 105 | wos/pubmed | Zhu H, Liao SD, Shi JJ, et al. DJ-1 mediates the resistance of cancer cells to dihydroartemisinin through reactive oxygen species removal. Free radical biology & medicine. 2014;71:121-132.                                                                                                             |
| Duplicated study | 106 | wos/pubmed | Zhu XL, Sun W, Lei WB, Zhuang HW, Hou WJ, Wen WP. DJ-1-induced phosphatase and tensin homologue downregulation is associated with proliferative and invasive activity of laryngeal cancer cells. Molecular medicine reports. 2015;12(2):2003-2008.                                                       |
| Duplicated study | 107 | wos/pubmed | Zhu XL, Wang ZF, Lei WB, Zhuang HW, Jiang HY, Wen WP. DJ-1: a novel independent prognostic marker for survival in glottic squamous cell carcinoma. Cancer Sci. 2010;101(5):1320-1325.                                                                                                                    |
| Duplicated study | 108 | wos/pubmed | Zhu ZM, Li ZR, Huang Y, et al. DJ-1 is involved in the peritoneal metastasis of gastric cancer through activation of the Akt signaling pathway. Oncology reports. 2014;31(3):1489-1497.                                                                                                                  |
| Duplicated study | 109 | wos/pubmed | Zong MJ, Jia L, Li L. Expression of novel tumor markers of pancreatic adenocarcinomas in intrahepatic cholangiocarcinomas. OncoTargets and therapy. 2013;6:19-23.                                                                                                                                        |
| Unrelated study  | 1   |            | Alberio T, Colapinto M, Natale M, et al. Changes in the two-dimensional electrophoresis pattern of the Parkinson's disease related protein DJ-1 in human SH-SY5Y neuroblastoma cells after dopamine treatment. IUBMB life. 2010;62(9):688-692.                                                           |
| Unrelated study  | 2   |            | Wen Luo LD, Qi Su. The Abnormal Expression of DJ-1 in the progress of Tumor Research MEDICAL SCIENCE JOURNAL OF CENTRAL SOUTH CHINA. 2013(1):83-88.                                                                                                                                                      |
| Unrelated study  | 3   |            | Alvarez-Chaver P, Rodriguez-Pineiro AM, Rodriguez-Berrocal FJ, Garcia-Lorenzo A, Paez de la Cadena M, Martinez-Zorzano VS. Selection of putative colorectal cancer markers by applying PCA on the soluble proteome of tumors: NDK A as a promising candidate. Journal of proteomics. 2011;74(6):874-886. |

|                 |    |                                                                                                                                                                                                                                                          |
|-----------------|----|----------------------------------------------------------------------------------------------------------------------------------------------------------------------------------------------------------------------------------------------------------|
| Unrelated study | 4  | Alves da Costa C, Checler F. Apoptosis in Parkinson's disease: is p53 the missing link between genetic and sporadic Parkinsonism? Cellular signalling. 2011;23(6):963-968.                                                                               |
| Unrelated study | 5  | Amatullah H, Shan Y, Beauchamp BL, et al. DJ-1/PARK7 Impairs Bacterial Clearance in Sepsis. American journal of respiratory and critical care medicine. 2017;195(7):889-905.                                                                             |
| Unrelated study | 6  | Ariga H. Common Mechanisms of Onset of Cancer and Neurodegenerative Diseases. Biological & pharmaceutical bulletin. 2015;38(6):795-808.                                                                                                                  |
| Unrelated study | 7  | Ashley AK, Hanneman WH, Katoh T, et al. Analysis of targeted mutation in DJ-1 on cellular function in primary astrocytes. Toxicology letters. 2009;184(3):186-191.                                                                                       |
| Unrelated study | 8  | Aslam K, Tsai CJ, Hazbun TR. The small heat shock protein Hsp31 cooperates with Hsp104 to modulate Sup35 prion aggregation. Prion. 2016;10(6):444-465.                                                                                                   |
| Unrelated study | 9  | Baumunk D, Reichelt U, Hildebrandt J, et al. Expression parameters of the metabolic pathway genes pyruvate dehydrogenase kinase-1 (PDK-1) and DJ-1/PARK7 in renal cell carcinoma (RCC). World journal of urology. 2013;31(5):1191-1196.                  |
| Unrelated study | 10 | Billia F, Hauck L, Grothe D, et al. Parkinson-susceptibility gene DJ-1/PARK7 protects the murine heart from oxidative damage in vivo. Proceedings of the National Academy of Sciences of the United States of America. 2013;110(15):6085-6090.           |
| Unrelated study | 11 | Bincai Pan GX, Songli Zhao. et al. Expression of DJ-I and mTOR in recurrence of benign meningiomas. International Journal of Pathology and Clinical Medicine. 2014(02):129-134.                                                                          |
| Unrelated study | 12 | Bindukumar B, Schwartz S, Aalinkeel R, Mahajan S, Lieberman A, Chadha K. Proteomic profiling of the effect of prostate-specific antigen on prostate cancer cells. The Prostate. 2008;68(14):1531-1545.                                                   |
| Unrelated study | 13 | Bitar MS, Liu CL, Ziaei A, Chen YM, Schmedt T, Jurkunas UV. Decline in DJ-1 and Decreased Nuclear Translocation of Nrf2 in Fuchs Endothelial Corneal Dystrophy. Investigative ophthalmology & visual science. 2012;53(9):5806-5813.                      |
| Unrelated study | 14 | Blackinton J, Ahmad R, Miller DW, et al. Effects of DJ-1 mutations and polymorphisms on protein stability and subcellular localization. Brain research Molecular brain research. 2005;134(1):76-83.                                                      |
| Unrelated study | 15 | Bu JY, Li GW, Xiao XY, Zhu YX, Liang ZB, Hou BZ. DJ-1 inhibits the progression of papillary thyroid carcinoma by targeting akt pathway. International journal of clinical and experimental pathology. 2016;9(3):3030-3036.                               |
| Unrelated study | 16 | Butler GS, Dean RA, Tam EM, Overall CM. Pharmacoproteomics of a metalloproteinase hydroxamate inhibitor in breast cancer cells: Dynamics of membrane type 1 matrix metalloproteinase-mediated membrane protein shedding. Molecular and cellular biology. |

---

|                 |    |                                                                                                                                                                                                                                                            |
|-----------------|----|------------------------------------------------------------------------------------------------------------------------------------------------------------------------------------------------------------------------------------------------------------|
|                 |    | 2008;28(15):4896-4914.                                                                                                                                                                                                                                     |
| Unrelated study | 17 | Cao J, Chen X, Ying M, He Q, Yang B. DJ-1 as a Therapeutic Target Against Cancer. <i>Advances in experimental medicine and biology</i> . 2017;1037:203-222.                                                                                                |
| Unrelated study | 18 | Cao J, Lou SY, Ying MD, Yang B. DJ-1 as a human oncogene and potential therapeutic target. <i>Biochemical pharmacology</i> . 2015;93(3):241-250.                                                                                                           |
| Unrelated study | 19 | Cao J, Ying M, Xie N, et al. The oxidation states of DJ-1 dictate the cell fate in response to oxidative stress triggered by 4-hpr: autophagy or apoptosis? <i>Antioxidants &amp; redox signaling</i> . 2014;21(10):1443-1459.                             |
| Unrelated study | 20 | Caputo E, Maiorana L, Vasta V, et al. Characterization of human melanoma cell lines and melanocytes by proteome analysis. <i>Cell cycle (Georgetown, Tex)</i> . 2011;10(17):2924-2936.                                                                     |
| Unrelated study | 21 | Chan A, Diamandis EP, Blasutig IM. Strategies for discovering novel pancreatic cancer biomarkers. <i>Journal of proteomics</i> . 2013;81:126-134.                                                                                                          |
| Unrelated study | 22 | Chan JYH, Chan SHH. Activation of endogenous antioxidants as a common therapeutic strategy against cancer, neurodegeneration and cardiovascular diseases: A lesson learnt from DJ-1. <i>Pharmacology &amp; therapeutics</i> . 2015;156:69-74.              |
| Unrelated study | 23 | Chang C. Parkin protects mitochondrial homeostasis in SH-SY5Y cells with DJ-1 down-regulation and DJ-1 L166P mutation through oxidative stress pathway [doctor], Fudan university; 2012.                                                                   |
| Unrelated study | 24 | Chen Y. DJ-1, a novel biomarker and a selected target gene for overcoming chemoresistance in pancreatic cancer, zhejiang university; 2012.                                                                                                                 |
| Unrelated study | 25 | Chen YM, Gao C, Sun Q, et al. MicroRNA-4639 Is a Regulator of DJ-1 Expression and a Potential Early Diagnostic Marker for Parkinson's Disease. <i>Frontiers in Aging Neuroscience</i> . 2017;9.                                                            |
| Unrelated study | 26 | Cheng YT, Ho CY, Jhang JJ, Lu CC, Yen GC. DJ-1 plays an important role in caffeic acid-mediated protection of the gastrointestinal mucosa against ketoprofen-induced oxidative damage. <i>Journal of Nutritional Biochemistry</i> . 2014;25(10):1045-1057. |
| Unrelated study | 27 | Chien CH, Lee MJ, Liou HC, Liou HH, Fu WM. Growth hormone is increased in the lungs and enhances experimental lung metastasis of melanoma in DJ-1 KO mice. <i>BMC cancer</i> . 2016;16.                                                                    |
| Unrelated study | 28 | Chien CH, Lee MJ, Liou HC, Liou HH, Fu WM. Local immunosuppressive microenvironment enhances migration of melanoma cells to lungs in DJ-1 knockout mice. <i>PLoS one</i> . 2015;10(2):e0115827.                                                            |
| Unrelated study | 29 | Choi SK, Hong YO, Lee WM, et al. Overexpression of PI3K-p 110 alpha in the progression of uterine cervical neoplasia and its                                                                                                                               |

---

---

|                 |    |                                                                                                                                                                                                                                                                                                       |
|-----------------|----|-------------------------------------------------------------------------------------------------------------------------------------------------------------------------------------------------------------------------------------------------------------------------------------------------------|
| study           |    | correlation with pAkt and DJ-1. <i>European journal of gynaecological oncology</i> . 2015;36(4):389-393.                                                                                                                                                                                              |
| Unrelated study | 30 | Clements CM, McNally RS, Conti BJ, Mak TW, Ting JPY. DJ-1, a cancer- and Parkinson's disease-associated protein, stabilizes the antioxidant transcriptional master regulator Nrf2. <i>Proceedings of the National Academy of Sciences of the United States of America</i> . 2006;103(41):15091-15096. |
| Unrelated study | 31 | Dan Yu YL, Xiu Nie. Research progress of cancer gene PARK7/DJ-1 in tumor. <i>Journal of Medical Research</i> . 2016(05):6-9.                                                                                                                                                                          |
| Unrelated study | 32 | Das F, Dey N, Venkatesan B, Kasinath BS, Ghosh-Choudhury N, Choudhury GG. High glucose upregulation of early-onset Parkinson's disease protein DJ-1 integrates the PRAS40/TORC1 axis to mesangial cell hypertrophy. <i>Cellular signalling</i> . 2011;23(8):1311-1319.                                |
| Unrelated study | 33 | Deganuto M, Cesaratto L, Bellarosa C, et al. A proteomic approach to the bilirubin-induced toxicity in neuronal cells reveals a protective function of DJ-1 protein. <i>Proteomics</i> . 2010;10(8):1645-1657.                                                                                        |
| Unrelated study | 34 | Deng W. Effect of DJ-1 on Proliferation, Apoptosis and Invasion of Ovarian Cancer SKOV3 Cells [Master], Nanchang University; 2015.                                                                                                                                                                    |
| Unrelated study | 35 | Deqing Fan HD, Ling Wang. Correlation between DJ-1 and PTEN expressions and clinical pathology of elderly patients with local advanced triple-negative breast cancer. <i>Chinese Journal of Woman and Child Health Research</i> . 2017(09):1130-1132.                                                 |
| Unrelated study | 36 | Dong Ye ZS. The Research Progress of DJ-1 Gene in Tumors. <i>MEDICAL INNOVATION OF CHINA</i> . 2010(8):155-157.                                                                                                                                                                                       |
| Unrelated study | 37 | Duan XB, Kelsen SG, Merali S. Proteomic Analysis of Oxidative Stress-Responsive Proteins in Human Pneumocytes: Insight into the Regulation of DJ-1 Expression. <i>Journal of proteome research</i> . 2008;7(11):4955-4961.                                                                            |
| Unrelated study | 38 | Eltoweissy M, Dihazi GH, Muller GA, Asif AR, Dihazi H. Protein DJ-1 and its anti-oxidative stress function play an important role in renal cell mediated response to profibrotic agents. <i>Molecular Biosystems</i> . 2016;12(6):1842-1859.                                                          |
| Unrelated study | 39 | Fan J. Parkinson's disease-associated protein DJ-1 inhibits transcriptional activity of p53 [Doctor], University of Science and Technology of China; 2008.                                                                                                                                            |
| Unrelated study | 40 | Fan ZJ, Hu XM, Zhang YP, Yu C, Qian K, Qin AJ. Proteomics of DF-1 cells infected with avian leukosis virus subgroup Virus Research. 2012;167(2):314-321.                                                                                                                                              |
| Unrelated study | 41 | Fang M. DJ-1 Regulates Dedifferentiation and Migration Invasion of Human Glioma [DOCTOR], Jinan University; 2011.                                                                                                                                                                                     |

---

---

|                 |    |                                                                                                                                                                                                                                                                                                                    |
|-----------------|----|--------------------------------------------------------------------------------------------------------------------------------------------------------------------------------------------------------------------------------------------------------------------------------------------------------------------|
| study           |    |                                                                                                                                                                                                                                                                                                                    |
| Unrelated study | 42 | Fang Mao, Jie Long HW, et al. Influence of RNA Interference Induced Silencing of DJ-1 Gene on Migration and Invasion Potential in Triple-Negative Breast Cancer Cells. <i>Progress in Modern Biomedicine</i> . 2014(07):1239-1242.                                                                                 |
| Unrelated study | 43 | Fasano M, Alberio T, Colapinto M, Mila S, Lopiano L. Proteomics as a tool to investigate cell models for dopamine toxicity. <i>Parkinsonism &amp; related disorders</i> . 2008;14 Suppl 2:S135-138.                                                                                                                |
| Unrelated study | 44 | Foti R, Zucchelli S, Biagioli M, et al. Parkinson disease-associated DJ-1 is required for the expression of the glial cell line-derived neurotrophic factor receptor RET in human neuroblastoma cells. <i>The Journal of biological chemistry</i> . 2010;285(24):18565-18574.                                      |
| Unrelated study | 45 | Fu K, Ren H, Wang Y, Fei E, Wang H, Wang G. DJ-1 inhibits TRAIL-induced apoptosis by blocking pro-caspase-8 recruitment to FADD. <i>Oncogene</i> . 2012;31(10):1311-1322.                                                                                                                                          |
| Unrelated study | 46 | Fu K. Parkinson's disease and cancer-associated protein DJ-1 inhibit TRAIL apoptosis signaling pathway. 2011.                                                                                                                                                                                                      |
| Unrelated study | 47 | Gao JW, Yamane T, Maita H, et al. DJ-1-Mediated protective effect of protocatechuic aldehyde against oxidative stress in SH-SY5Y cells. <i>Journal of pharmacological sciences</i> . 2011;115(1):36-44.                                                                                                            |
| Unrelated study | 48 | Gao X, Ning Y. CANCER AND PARKINSON'S DISEASE: THE ODD COUPLE. <i>Drugs of Today</i> . 2011;47(3):215-222.                                                                                                                                                                                                         |
| Unrelated study | 49 | Ghazale N, Fakhoury I, Rizk S, Abou Antoun T, Kanaan A, El-Sibai M. Susceptibility of Cancer Cells to Sodium Phenyl Butyrate is Associated with DJ-1 Expression and Downstream Signaling. <i>Molecular Biology of the Cell</i> . 2017;28.                                                                          |
| Unrelated study | 50 | Giusti L, Iacconi P, Ciregia F, et al. Fine-needle aspiration of thyroid nodules: proteomic analysis to identify cancer biomarkers. <i>Journal of proteome research</i> . 2008;7(9):4079-4088.                                                                                                                     |
| Unrelated study | 51 | Gonzalez-Polo R, Niso-Santano M, Moran JM, et al. Silencing DJ-1 reveals its contribution in paraquat-induced autophagy. <i>Journal of neurochemistry</i> . 2009;109(3):889-898.                                                                                                                                   |
| Unrelated study | 52 | Gonzalez-Polo RA, Niso-Santano M, Gomez-Sanchez R, Bravo-San Pedro JM, Fuentes JM. DJ-1 as a modulator of autophagy: an hypothesis. <i>TheScientificWorldJournal</i> . 2010;10:1574-1579.                                                                                                                          |
| Unrelated study | 53 | Grzmil M, Voigt S, Thelen P, Hemmerlein B, Helmke K, Burfeind P. Up-regulated expression of the MAT-8 gene in prostate cancer and its siRNA-mediated inhibition of expression induces a decrease in proliferation of human prostate carcinoma cells. <i>International journal of oncology</i> . 2004;24(1):97-105. |

---

---

|                 |    |                                                                                                                                                                                                                                                                                                                     |
|-----------------|----|---------------------------------------------------------------------------------------------------------------------------------------------------------------------------------------------------------------------------------------------------------------------------------------------------------------------|
| Unrelated study | 54 | Guanying Xiao SZ, Zhanmin Su, et al. The relationship between expressions of DJ-1 and PTEN in benign meningiomas relapse and evolution. <i>China Medical Engineering</i> . 2015(09):12-13+15.                                                                                                                       |
| Unrelated study | 55 | Guo C. A preliminary study on the effect of DJ-1 protein on lung cancer metastasis. 2007.                                                                                                                                                                                                                           |
| Unrelated study | 56 | Haniu H, Tsukahara T, Matsuda Y, et al. DJ-1 as a potential biomarker for the development of biocompatible multiwalled carbon nanotubes. <i>International Journal of Nanomedicine</i> . 2011;6:2689-2695.                                                                                                           |
| Unrelated study | 57 | Hao Yan WL, Jianjun Xu, et al. Protective effects of DJ-1 via antagonizing ROS-induced Beclin-1 up-regulation in hypoxia-reoxygenated HL-1 cardiomyocytes. <i>Basic &amp; Clinical Medicine</i> . 2013(06):763-768.                                                                                                 |
| Unrelated study | 58 | Haung Y. Construction of Eukaryotic Expression Vector for DJ-1-shRNA and Its Effect on Transfected SGC7901 Gastric Cancer Cell Line DJ-1 [Master], Nanchang university; 2013.                                                                                                                                       |
| Unrelated study | 59 | He X. Clinical significance and possible mechanism of DJ-1 expression in tumors. <i>JOURNAL OF INTERNATIONAL ONCOLOGY</i> . 2009(7):494-496.                                                                                                                                                                        |
| Unrelated study | 60 | He XY, Yuan YZ. Silence of DJ-1 to overcome anti-EGFR therapy resistance in pancreatic cancer. <i>Journal of Gastroenterology and Hepatology</i> . 2014;29:212-212.                                                                                                                                                 |
| Unrelated study | 61 | He XY, Zheng Z, Li JF, et al. DJ-1 promotes invasion and metastasis of pancreatic cancer cells by activating SRC/ERK/uPA. <i>Carcinogenesis</i> . 2012;33(3):555-562.                                                                                                                                               |
| Unrelated study | 62 | Hinkle DA, Mullett SJ, Gabris BE, Hamilton RL. DJ-1 expression in glioblastomas shows positive correlation with p53 expression and negative correlation with epidermal growth factor receptor amplification. <i>Neuropathology : official journal of the Japanese Society of Neuropathology</i> . 2011;31(1):29-37. |
| Unrelated study | 63 | Hod Y. Differential control of apoptosis by DJ-1 in prostate benign and cancer cells. <i>Journal of cellular biochemistry</i> . 2004;92(6):1221-1233.                                                                                                                                                               |
| Unrelated study | 64 | Huai Q, Sun YJ, Wang HC, et al. Crystal structure of DJ-1/RS and implication on familial Parkinson's disease. <i>FEBS letters</i> . 2003;549(1-3):171-175.                                                                                                                                                          |
| Unrelated study | 65 | Hudson TS, Hartle DK, Hursting SD, et al. Inhibition of prostate cancer growth by muscadine grape skin extract and resveratrol through distinct mechanisms. <i>Cancer research</i> . 2007;67(17):8396-8405.                                                                                                         |
| Unrelated study | 66 | Inzelberg R, Jankovic J. Are Parkinson disease patients protected from some but not all cancers? <i>Neurology</i> . 2007;69(15):1542-1550.                                                                                                                                                                          |

---

---

|                 |    |                                                                                                                                                                                                                                           |
|-----------------|----|-------------------------------------------------------------------------------------------------------------------------------------------------------------------------------------------------------------------------------------------|
| study           |    |                                                                                                                                                                                                                                           |
| Unrelated study | 67 | Ismail IA, Kang HS, Lee HJ, Kim JK, Hong SH. DJ-1 upregulates breast cancer cell invasion by repressing KLF17 expression. <i>British journal of cancer</i> . 2014;110(5):1298-1306.                                                       |
| Unrelated study | 68 | Ismail IA, Kang HS, Lee HJ, Kwon BM, Hong SH. 2'-Benzoyloxycinnamaldehyde-mediated DJ-1 upregulation protects MCF-7 cells from mitochondrial damage. <i>Biological &amp; pharmaceutical bulletin</i> . 2012;35(6):895-902.                |
| Unrelated study | 69 | Ismail IA, Shakor ABA, Hong SH. DJ-1 Protects Breast Cancer Cells Against 2-Benzoyloxycinnamaldehyde-induced Oxidative Stress Independent of Nrf2. <i>Journal of cellular physiology</i> . 2015;230(9):2262-2269.                         |
| Unrelated study | 70 | Jain D, Jain R, Eberhard D, et al. Age- and diet-dependent requirement of DJ-1 for glucose homeostasis in mice with implications for human type 2 diabetes. <i>Journal of molecular cell biology</i> . 2012;4(4):221-230.                 |
| Unrelated study | 71 | Jain R, Kulkarni P, Dhali S, Rapole S, Srivastava S. Quantitative proteomic analysis of global effect of LLL12 on U87 cell's proteome: An insight into the molecular mechanism of LLL12. <i>Journal of proteomics</i> . 2015;113:127-142. |
| Unrelated study | 72 | Ji X, Inventor. Cell-based screening assays for compounds that regulate the expression of a tumor marker dj-1. US patent US2010047776(A1). 2006-05-08, 2006.                                                                              |
| Unrelated study | 73 | Jie He WW, Qianjin Liao, et al. The Signal Transduction-Associated Protein in HL-60 Cell Induced by DADS. <i>JOURNAL OF NANHUA UNIVERSITY(MEDICAL EDITION)</i> . 2007(4):477-480.                                                         |
| Unrelated study | 74 | Jin SG, Dai Y, Li C, Fang X, Han HJ, Wang DX. MicroRNA-544 inhibits glioma proliferation, invasion and migration but induces cell apoptosis by targeting PARK7. <i>American Journal of Translational Research</i> . 2016;8(4):1826-1837.  |
| Unrelated study | 75 | JIN X, Inventor. CELL-BASED SCREENING ASSAYS FOR COMPOUNDS THAT REGULATE THE EXPRESSION OF A TUMOR MARKER DJ-1. 2006-05-08, 2006.                                                                                                         |
| Unrelated study | 76 | Jing Chen HW, Hui Cheng, et al. The value of combined detection of tumor markers DJ-1, NSE, CYFRA21-1 and CEA in diagnosis of lung cancer. <i>International Journal of Laboratory Medicine</i> . 2013(6):651-652,655.                     |
| Unrelated study | 77 | Jinjin Yan KS, Qizhou Zhu. The correlation between DJ-1 and tumor. <i>GUANGDONG MEDICAL JOURNAL</i> . 2011(23):3147-3149.                                                                                                                 |
| Unrelated study | 78 | Jinzhang Chen WH, Dayong Zheng, et al. The Role of DJ-1 Gene in the Development of Lung Cancer. <i>The Practical Journal of Cancer</i> . 2015(3):317-319.                                                                                 |
| Unrelated study | 79 | Jo HS, Yeo EJ, Shin MJ, et al. Tat-DJ-1 enhances cell survival by inhibition of oxidative stress, NF-kappa B and MAPK activation in                                                                                                       |

---

---

|                 |    |                                                                                                                                                                                                                                                                            |
|-----------------|----|----------------------------------------------------------------------------------------------------------------------------------------------------------------------------------------------------------------------------------------------------------------------------|
| study           |    | HepG2 cells. <i>Biotechnology Letters</i> . 2017;39(4):511-521.                                                                                                                                                                                                            |
| Unrelated study | 80 | Juan wang YY, Jin Qin, et al. Diallyl Disulfide down regulated DJ-1 inhibiting ability of proliferation and inducing human leukemic cell differentiation. <i>Chinese Pharmacological Bulletin</i> . 2015(03):416-420.                                                      |
| Unrelated study | 81 | Junn E, Jang WH, Zhao X, Jeong BS, Mouradian MM. Mitochondrial localization of DJ-1 leads to enhanced neuroprotection. <i>Journal of neuroscience research</i> . 2009;87(1):123-129.                                                                                       |
| Unrelated study | 82 | Kahle PJ, Waak J, Gasser T. DJ-1 and prevention of oxidative stress in Parkinson's disease and other age-related disorders. <i>Free radical biology &amp; medicine</i> . 2009;47(10):1354-1361.                                                                            |
| Unrelated study | 83 | Kapoor S. DJ-1 and its emerging role as a biomarker of systemic malignancies besides lung carcinomas. <i>Molecular biology reports</i> . 2013;40(2):1529.                                                                                                                  |
| Unrelated study | 84 | Kawate T, Iwaya K, Koshikawa K, et al. High levels of DJ-1 protein and isoelectric point 6.3 isoform in sera of breast cancer patients. <i>Cancer Science</i> . 2015;106(7):938-943.                                                                                       |
| Unrelated study | 85 | Kawate T, Tsuchiya B, Iwaya K. Expression of DJ-1 in Cancer Cells: Its Correlation with Clinical Significance. <i>Advances in experimental medicine and biology</i> . 2017;1037:45-59.                                                                                     |
| Unrelated study | 86 | Kawate T. DJ-1 as a predictor of pathologic complete remission of neoadjuvant chemotherapy with breast cancer patients. <i>Journal of Clinical Oncology</i> . 2012;30(15).                                                                                                 |
| Unrelated study | 87 | Kim DK, Beaven MA, Kulinski JM, et al. Regulation of Reactive Oxygen Species and the Antioxidant Protein DJ-1 in Mastocytosis. <i>PloS one</i> . 2016;11(9).                                                                                                               |
| Unrelated study | 88 | Kim RH, Mak TW. Tumours and tremors: how PTEN regulation underlies both. <i>British journal of cancer</i> . 2006;94(5):620-624.                                                                                                                                            |
| Unrelated study | 89 | Kim RH, Peters M, Jang Y, et al. DJ-1, a novel regulator of the tumor suppressor PTEN. <i>Cancer cell</i> . 2005;7(3):263-273.                                                                                                                                             |
| Unrelated study | 90 | Kim RH, Smith PD, Aleyasin H, et al. Hypersensitivity of DJ-1-deficient mice to 1-methyl-4-phenyl-1,2,3,6-tetrahydropyridine (MPTP) and oxidative stress. <i>Proceedings of the National Academy of Sciences of the United States of America</i> . 2005;102(14):5215-5220. |
| Unrelated study | 91 | Kim YC, Kitaura H, Iguchi-Ariga SMM, Ariga H. DJ-1, an oncogene and causative gene for familial Parkinson's disease, is essential for SV40 transformation in mouse fibroblasts through up-regulation of c-Myc. <i>FEBS letters</i> . 2010;584(18):3891-3895.               |

---



---

|                 |     |                                                                                                                                                                                                                                      |
|-----------------|-----|--------------------------------------------------------------------------------------------------------------------------------------------------------------------------------------------------------------------------------------|
| Unrelated study | 92  | Kim YC, Kitaura H, Taira T, Iguchi-Arigo SMM, Ariga H. Oxidation of DJ-1-dependent cell transformation through direct binding of DJ-1 to PTEN. <i>International journal of oncology</i> . 2009;35(6):1331-1341.                      |
| Unrelated study | 93  | Knobbe CB, Revett TJ, Bai Y, et al. Choice of Biological Source Material Supersedes Oxidative Stress in Its Influence on DJ-1 in Vivo Interactions with Hsp90. <i>Journal of proteome research</i> . 2011;10(10):4388-4404.          |
| Unrelated study | 94  | Kolisek M, Montezano AC, Sponder G, et al. PARK7/DJ-1 dysregulation by oxidative stress leads to magnesium deficiency: implications in degenerative and chronic diseases. <i>Clinical Science</i> . 2015;129(12):1143-1150.          |
| Unrelated study | 95  | Kumar P, Nandi S, Tan TZ, et al. Highly sensitive and specific novel biomarkers for the diagnosis of transitional bladder carcinoma. <i>Oncotarget</i> . 2015;6(15):13539-13549.                                                     |
| Unrelated study | 96  | Kwon HS, Park JH, Hwang HS, Sohn IS, Kim YH, Cho S. Effect of DJ-1 Downregulation on the Functions of the First Trimester Extravillous Trophoblasts. <i>Reproductive sciences (Thousand Oaks, Calif)</i> . 2017;1933719117746760.    |
| Unrelated study | 97  | Le Naour F, Misek DE, Krause MC, et al. Proteomics-based identification of RS/DJ-1 as a novel circulating tumor antigen in breast cancer. <i>Clinical Cancer Research</i> . 2001;7(11):3328-3335.                                    |
| Unrelated study | 98  | Lee H, Choi SK, Ro JY. Overexpression of DJ-1 and HSP90alpha, and loss of PTEN associated with invasive urothelial carcinoma of urinary bladder: Possible prognostic markers. <i>Oncology letters</i> . 2012;3(3):507-512.           |
| Unrelated study | 99  | Lei YL, Huang K, Gao C, et al. Proteomics Identification of ITGB3 as a Key Regulator in Reactive Oxygen Species-induced Migration and Invasion of Colorectal Cancer Cells. <i>Molecular &amp; Cellular Proteomics</i> . 2011;10(10). |
| Unrelated study | 100 | Lev N, Roncevic D, Ickowicz D, Melamed E, Offen D. Role of DJ-1 in Parkinson's disease. <i>Journal of molecular neuroscience : MN</i> . 2006;29(3):215-225.                                                                          |
| Unrelated study | 101 | Levine AJ, Harris CR, Puzio-Kuter AM. The Interfaces Between Signal Transduction Pathways: IGF-1/mTor, p53 and the Parkinson Disease Pathway. <i>Oncotarget</i> . 2012;3(11):1301-1307.                                              |
| Unrelated study | 102 | Li Q. THE EFFECTS OF DADS ON PROLIFERRATION AND INVASION OF LYMPHOMA CELLS BY DOWN REGULATE DJ-1 THROUGH BLOCKING SRC AND ERK PATHWAY, Nanhua University; 2016.                                                                      |
| Unrelated study | 103 | Li QY, Tang YX, Qin J, et al. Subcellular localization of DJ-1 in human HL-60 leukemia cells in response to diallyl disulfide treatment. <i>Molecular medicine reports</i> . 2016;14(5):4666-4672.                                   |
| Unrelated study | 104 | Liang H. Effect of DJ-1 on Proliferation, Apoptosis, Migration and Invasion of Acute Lymphoblastic Leukemia Cells [Doctor], Shandong university; 2014.                                                                               |

---

|                 |     |                                                                                                                                                                                                                                                          |
|-----------------|-----|----------------------------------------------------------------------------------------------------------------------------------------------------------------------------------------------------------------------------------------------------------|
| Unrelated study | 105 | Lin PY, Chang SN, Hsiao TH, Huang BT, Lin CH, Yang PC. Association Between Parkinson Disease and Risk of Cancer in Taiwan. <i>Jama Oncology</i> . 2015;1(5):633-640.                                                                                     |
| Unrelated study | 106 | Lisi You BY, Xiaoyan Chen. Expression of DJ-1 in pancreatic cancer and its clinical significance. <i>Oncology Progress</i> . 2017(2):152-155.                                                                                                            |
| Unrelated study | 107 | Lisitskaia KV, Eremina LS, Ivanov AV, et al. Study of Dj-1 protein in tissue specimens, cultured cells and serum of prostate cancer patients. <i>Biomeditsinskaia khimii</i> . 2011;57(4):392-401.                                                       |
| Unrelated study | 108 | Liu H, Wang M, Li M, et al. Expression and role of DJ-1 in leukemia. <i>Biochemical and biophysical research communications</i> . 2008;375(3):477-483.                                                                                                   |
| Unrelated study | 109 | Liu H. Effect of iASPP expression blockade by siRNA on DJ-1 in leukemia Cell [DOCTOR], China Union Medical College; 2008.                                                                                                                                |
| Unrelated study | 110 | Liu SF, Long GX, Wei HL, et al. DJ-1 knockdown inhibits growth and xenograft-induced tumor generation of human hepatocellular carcinoma cells. <i>Oncology reports</i> . 2015;33(1):201-206.                                                             |
| Unrelated study | 111 | LIU Shunfang LJ, YANG Zhifang. DJ-1 shRNA reverses multidrug resistance of human breast cancer Adriamycin resistant cell line MCF-7 /ADM. <i>Chinese Journal of General Surgery</i> . 2010(11):1219-1222.                                                |
| Unrelated study | 112 | Long S. Effect of DJ-1 on Proliferation and Apoptosis of Endometrial Carcinoma Cell Line Ishikawa [Master], Nanchang University; 2013.                                                                                                                   |
| Unrelated study | 113 | MacKeigan JP, Clements CM, Lich JD, Pope RM, Hod Y, Ting JP. Proteomic profiling drug-induced apoptosis in non-small cell lung carcinoma: identification of RS/DJ-1 and RhoGDIalpha. <i>Cancer research</i> . 2003;63(20):6928-6934.                     |
| Unrelated study | 114 | Maita C, Tsuji S, Yabe I, et al. Secretion of DJ-1 into the serum of patients with Parkinson's disease. <i>Neuroscience letters</i> . 2008;431(1):86-89.                                                                                                 |
| Unrelated study | 115 | Mao Fang JL, Hongyan Wang, Zeping Weng. DJ-1 inhibits PTEN expression and increases AR in metastasis of non-hormone-dependent breast cancer. <i>China Journal of Modern Medicine</i> . 2014(14):32-37.                                                   |
| Unrelated study | 116 | Marcondes AM, Li X, Gooley TA, Milless B, Deeg HJ. Identification of DJ-1/PARK-7 as a determinant of stroma-dependent and TNF-alpha-induced apoptosis in MDS using mass spectrometry and phosphopeptide analysis. <i>Blood</i> . 2010;115(10):1993-2002. |
| Unrelated study | 117 | McNally RS, Davis BK, Clements CM, Accavitti-Loper MA, Mak TW, Ting JP. DJ-1 enhances cell survival through the binding of Cezanne, a negative regulator of NF-kappaB. <i>The Journal of biological chemistry</i> . 2011;286(6):4098-4106.               |

---

|                 |     |                                                                                                                                                                                                                                                                                                                                                      |
|-----------------|-----|------------------------------------------------------------------------------------------------------------------------------------------------------------------------------------------------------------------------------------------------------------------------------------------------------------------------------------------------------|
| Unrelated study | 118 | Meiser J, Vazquez A, Hiller K. DJ1 at the interface between neuro-degeneration and cancer. <i>Oncotarget</i> . 2017;8(6):9015-9016.                                                                                                                                                                                                                  |
| Unrelated study | 119 | Melle C, Ernst G, Escher N, et al. Protein profiling of microdissected pancreas carcinoma and identification of HSP27 as a potential serum marker. <i>Clinical chemistry</i> . 2007;53(4):629-635.                                                                                                                                                   |
| Unrelated study | 120 | Mendivil-Perez M, Jimenez-Del-Rio M, Velez-Pardo C. Response to rotenone is glucose-sensitive in a model of human acute lymphoblastic leukemia: involvement of oxidative stress mechanism, DJ-1, Parkin, and PINK-1 proteins. <i>Oxidative medicine and cellular longevity</i> . 2014;2014:457154.                                                   |
| Unrelated study | 121 | Mihoub M, Abdallah J, Richarme G. Protein Repair from Glycation by Glyoxals by the DJ-1 Family Maillard Deglycates. <i>Advances in experimental medicine and biology</i> . 2017;1037:133-147.                                                                                                                                                        |
| Unrelated study | 122 | Miller-Fleming L, Antas P, Pais TF, Smalley JL, Giorgini F, Outeiro TF. Yeast DJ-1 superfamily members are required for diauxic-shift reprogramming and cell survival in stationary phase. <i>Proceedings of the National Academy of Sciences of the United States of America</i> . 2014;111(19):7012-7017.                                          |
| Unrelated study | 123 | Min Song ML, Chengping Hu, et al. Inhibitory Effect of RNA Interference DJ-1 Gene on Lung Adenocarcinoma A549 Cells 2011; wuhan.                                                                                                                                                                                                                     |
| Unrelated study | 124 | Morelli M, Scumaci D, Di Cello A, et al. DJ-1 in endometrial cancer: a possible biomarker to improve differential diagnosis between subtypes. <i>International journal of gynecological cancer : official journal of the International Gynecological Cancer Society</i> . 2014;24(4):649-658.                                                        |
| Unrelated study | 125 | Mukherjee S, Huang Z, Fa M, et al. Deciphering the role of HER3-DJ-1 interaction in breast cancer. <i>Cancer research</i> . 2013;73.                                                                                                                                                                                                                 |
| Unrelated study | 126 | Nagakubo D, Taira T, Kitaura H, et al. DJ-1, a novel oncogene which transforms mouse NIH3T3 cells in cooperation with ras. <i>Biochemical and biophysical research communications</i> . 1997;231(2):509-513.                                                                                                                                         |
| Unrelated study | 127 | Navarro-Yepes J, Anandhan A, Bradley E, et al. Inhibition of Protein Ubiquitination by Paraquat and 1-Methyl-4-Phenylpyridinium Impairs Ubiquitin-Dependent Protein Degradation Pathways. <i>Molecular neurobiology</i> . 2016;53(8):5229-5251.                                                                                                      |
| Unrelated study | 128 | Niere F, Namjoshi S, Song E, et al. Analysis of Proteins That Rapidly Change Upon Mechanistic/Mammalian Target of Rapamycin Complex 1 (mTORC1) Repression Identifies Parkinson Protein 7 (PARK7) as a Novel Protein Aberrantly Expressed in Tuberous Sclerosis Complex (TSC). <i>Molecular &amp; cellular proteomics : MCP</i> . 2016;15(2):426-444. |

---

|                 |     |                                                                                                                                                                                                                                                                                                                    |
|-----------------|-----|--------------------------------------------------------------------------------------------------------------------------------------------------------------------------------------------------------------------------------------------------------------------------------------------------------------------|
| Unrelated study | 129 | Niki T, Takahashi-Niki K, Taira T, Iguchi-Ariga SMM, Ariga H. DJBP: A novel DJ-1-binding protein, negatively regulates the androgen receptor by recruiting histone deacetylase complex, and DJ-1 antagonizes this inhibition by abrogation of this complex. <i>Molecular Cancer Research</i> . 2003;1(4):247-261.  |
| Unrelated study | 130 | Oh SE, Mouradian MM. Regulation of Signal Transduction by DJ-1. <i>Advances in experimental medicine and biology</i> . 2017;1037:97-131.                                                                                                                                                                           |
| Unrelated study | 131 | Ooe H, Maita C, Maita H, Iguchi-Ariga SM, Ariga H. Specific cleavage of DJ-1 under an oxidative condition. <i>Neuroscience letters</i> . 2006;406(3):165-168.                                                                                                                                                      |
| Unrelated study | 132 | Ooe H, Taira T, Iguchi-Ariga SM, Ariga H. Induction of reactive oxygen species by bisphenol A and abrogation of bisphenol A-induced cell injury by DJ-1. <i>Toxicological sciences : an official journal of the Society of Toxicology</i> . 2005;88(1):114-126.                                                    |
| Unrelated study | 133 | Opsahl JA, Hjørnevik LV, Bull VH, et al. Increased interaction between DJ-1 and the Mi-2/nucleosome remodelling and deacetylase complex during cellular stress. <i>Proteomics</i> . 2010;10(7):1494-1504.                                                                                                          |
| Unrelated study | 134 | Pardo M, Garcia A, Thomas B, et al. The characterization of the invasion phenotype of uveal melanoma tumour cells shows the presence of MUC18 and HMG-1 metastasis markers and leads to the identification of DJ-1 as a potential serum biomarker. <i>International journal of cancer</i> . 2006;119(5):1014-1022. |
| Unrelated study | 135 | Parsanejad M, Bourquard N, Qu D, et al. DJ-1 interacts with and regulates paraoxonase-2, an enzyme critical for neuronal survival in response to oxidative stress. <i>PloS one</i> . 2014;9(9):e106601.                                                                                                            |
| Unrelated study | 136 | Parsanejad M, Zhang Y, Qu D, et al. Regulation of the VHL/HIF-1 pathway by DJ-1. <i>The Journal of neuroscience : the official journal of the Society for Neuroscience</i> . 2014;34(23):8043-8050.                                                                                                                |
| Unrelated study | 137 | Pfaff DH, Fleming T, Nawroth P, Teleman AA. Evidence Against a Role for the Parkinsonism-associated Protein DJ-1 in Methylglyoxal Detoxification. <i>The Journal of biological chemistry</i> . 2017;292(2):685-690.                                                                                                |
| Unrelated study | 138 | Phark S, Park SY, Choi S, et al. Toxicological biomarkers of 2,3,4,7,8-pentachlorodibenzofuran in proteins secreted by HepG2 cells. <i>Biochimica Et Biophysica Acta-Proteins and Proteomics</i> . 2012;1824(4):656-666.                                                                                           |
| Unrelated study | 139 | Pitkanen-Arsiola T, Tillman JE, Gu GY, et al. Androgen and anti-androgen treatment modulates androgen receptor activity and DJ-1 stability. <i>The Prostate</i> . 2006;66(11):1177-1193.                                                                                                                           |
| Unrelated study | 140 | Ramasamy P, Murphy CC, Clynes M, et al. Proteomics in uveal melanoma. <i>Experimental eye research</i> . 2014;118:1-12.                                                                                                                                                                                            |

|                 |     |                                                                                                                                                                                                                                                                                                                                                           |
|-----------------|-----|-----------------------------------------------------------------------------------------------------------------------------------------------------------------------------------------------------------------------------------------------------------------------------------------------------------------------------------------------------------|
| Unrelated study | 141 | Ran Liu WW, Hui Tan. A review of DJ-1 antioxidant effects in Parkinson's disease and tumors. <i>Journal of Clinical and Pathology</i> . 2016(03):314-321.                                                                                                                                                                                                 |
| Unrelated study | 142 | Raninga PV, Di Trapani G, Tonissen KF. The Multifaceted Roles of DJ-1 as an Antioxidant. <i>Advances in experimental medicine and biology</i> . 2017;1037:67-87.                                                                                                                                                                                          |
| Unrelated study | 143 | Raninga PV, Di Trapani G, Vuckovic S, Tonissen KF. Targeted knockdown of DJ-1 induces multiple myeloma cell death via KLF6 upregulation. <i>Apoptosis : an international journal on programmed cell death</i> . 2016;21(12):1422-1437.                                                                                                                    |
| Unrelated study | 144 | Raninga PV, Trapani GD, Tonissen KF. Cross Talk between Two Antioxidant Systems, Thioredoxin and DJ-1: Consequences for Cancer. <i>Oncoscience</i> . 2014;1(1):95-110.                                                                                                                                                                                    |
| Unrelated study | 145 | Ren H, Fu K, Mu C, Li B, Wang D, Wang G. DJ-1, a cancer and Parkinson's disease associated protein, regulates autophagy through JNK pathway in cancer cells. <i>Cancer letters</i> . 2010;297(1):101-108.                                                                                                                                                 |
| Unrelated study | 146 | Ren H. Study on the Function of Parkinson's Disease and Cancer Related Protein DJ-1 in Autophagy and Mitochondria. 2010.                                                                                                                                                                                                                                  |
| Unrelated study | 147 | Ren HG, Fu K, Wang D, Mu CC, Wang GH. Oxidized DJ-1 Interacts with the Mitochondrial Protein BCL-X-L. <i>Journal of Biological Chemistry</i> . 2011;286(40):35308-35317.                                                                                                                                                                                  |
| Unrelated study | 148 | Richarme G, Marguet E, Forterre P, Ishino S, Ishino Y. DJ-1 family Maillard deglycases prevent acrylamide formation. <i>Biochemical and biophysical research communications</i> . 2016;478(3):1111-1116.                                                                                                                                                  |
| Unrelated study | 149 | Robert G, Puissant A, Dufies M, et al. The caspase 6 derived N-terminal fragment of DJ-1 promotes apoptosis via increased ROS production. <i>Cell death and differentiation</i> . 2012;19(11):1769-1778.                                                                                                                                                  |
| Unrelated study | 150 | Ruiz-Moreno C, Jimenez-Del-Rio M, Sierra-Garcia L, Lopez-Osorio B, Velez-Pardo C. Vitamin E synthetic derivate-TPGS- selectively induces apoptosis in jurkat t cells via oxidative stress signaling pathways: implications for acute lymphoblastic leukemia. <i>Apoptosis : an international journal on programmed cell death</i> . 2016;21(9):1019-1032. |
| Unrelated study | 151 | Saidu NEB, Noe G, Cerles O, et al. Dimethyl Fumarate Controls the NRF2/DJ-1 Axis in Cancer Cells: Therapeutic Applications. <i>Molecular cancer therapeutics</i> . 2017;16(3):529-539.                                                                                                                                                                    |
| Unrelated study | 152 | Sajjad MU, Green EW, Miller-Fleming L, et al. DJ-1 modulates aggregation and pathogenesis in models of Huntington's disease. <i>Human molecular genetics</i> . 2014;23(3):755-766.                                                                                                                                                                        |
| Unrelated study | 153 | Sawada S, Oberemm A, Buhrke T, et al. Proteomic analysis of 3-MCPD and 3-MCPD dipalmitate toxicity in rat testis. <i>Food and</i>                                                                                                                                                                                                                         |

|                 |     |                                                                                                                                                                                                                                                                                          |
|-----------------|-----|------------------------------------------------------------------------------------------------------------------------------------------------------------------------------------------------------------------------------------------------------------------------------------------|
| study           |     | chemical toxicology : an international journal published for the British Industrial Biological Research Association. 2015;83:84-92.                                                                                                                                                      |
| Unrelated study | 154 | Schumann C, Chan S, Khalimonchuk O, et al. Mechanistic Nanotherapeutic Approach Based on siRNA-Mediated DJ-1 Protein Suppression for Platinum-Resistant Ovarian Cancer. <i>Molecular pharmaceuticals</i> . 2016;13(6):2070-2083.                                                         |
| Unrelated study | 155 | Schumann C, Taratula O, Khalimonchuk O, et al. ROS-induced nanotherapeutic approach for ovarian cancer treatment based on the combinatorial effect of photodynamic therapy and DJ-1 gene suppression. <i>Nanomedicine-Nanotechnology Biology and Medicine</i> . 2015;11(8):1961-1970.    |
| Unrelated study | 156 | Sekito A, Taira T, Niki T, Iguchi-Ariga SMM, Ariga H. Stimulation of transforming activity of DJ-1 by Abstrakt, a DJ-1-binding protein. <i>International journal of oncology</i> . 2005;26(3):685-689.                                                                                   |
| Unrelated study | 157 | Shalaby SY, Louis ED. Increased Odds of Melanoma: Parkinson's Disease, Essential Tremor, Dystonia versus Controls. <i>Neuroepidemiology</i> . 2016;46(2):128-136.                                                                                                                        |
| Unrelated study | 158 | Shen Z, Deng H, Ye D, et al. [Effect of DJ-1 silencing by RNA interference on growth of xenografted human laryngeal squamous cell carcinoma Hep-2 cells in nude mice]. <i>Zhejiang da xue xue bao Yi xue ban = Journal of Zhejiang University Medical sciences</i> . 2016;45(4):349-355. |
| Unrelated study | 159 | Shen ZS, Jiang Z, Ye D, Xiao BX, Zhang XG, Guo JM. Growth inhibitory effects of DJ-1-small interfering RNA on laryngeal carcinoma Hep-2 cells. <i>Medical Oncology</i> . 2011;28(2):601-607.                                                                                             |
| Unrelated study | 160 | Shi H, Deng HX, Gius D, Schumacker PT, Surmeier DJ, Ma YC. Sirt3 protects dopaminergic neurons from mitochondrial oxidative stress. <i>Human molecular genetics</i> . 2017;26(10):1915-1926.                                                                                             |
| Unrelated study | 161 | Shi SY, Lu SY, Sivasubramaniyam T, et al. DJ-1 links muscle ROS production with metabolic reprogramming and systemic energy homeostasis in mice. <i>Nature communications</i> . 2015;6:7415.                                                                                             |
| Unrelated study | 162 | Shimwell NJ, Ward DG, Mohri Y, et al. Macrophage migration inhibitory factor and DJ-1 in gastric cancer: differences between high-incidence and low-incidence areas. <i>British journal of cancer</i> . 2012;107(9):1595-1601.                                                           |
| Unrelated study | 163 | Sinclair J, Metodieva G, Dafou D, Gayther SA, Timms JF. Profiling signatures of ovarian cancer tumour suppression using 2D-DIGE and 2D-LC-MS/MS with tandem mass tagging. <i>Journal of proteomics</i> . 2011;74(4):451-465.                                                             |
| Unrelated study | 164 | Singh Y, Chen H, Zhou Y, et al. Differential effect of DJ-1/PARK7 on development of natural and induced regulatory T cells. <i>Scientific reports</i> . 2015;5:17723.                                                                                                                    |
| Unrelated study | 165 | Song M. Regulation effect of DJ-1 protein on lung cancer microenvironment and its relationship with EGCG anti-cancer [doctor],                                                                                                                                                           |

|                 |     |                                                                                                                                                                                                                                                                                          |
|-----------------|-----|------------------------------------------------------------------------------------------------------------------------------------------------------------------------------------------------------------------------------------------------------------------------------------------|
| study           |     | Zhongnan university; 2010.                                                                                                                                                                                                                                                               |
| Unrelated study | 166 | Stefanatos R, Sriram A, Kiviranta E, et al. dj-1beta regulates oxidative stress, insulin-like signaling and development in <i>Drosophila melanogaster</i> . <i>Cell cycle (Georgetown, Tex)</i> . 2012;11(20):3876-3886.                                                                 |
| Unrelated study | 167 | Takahashi-Niki K, Niki T, Iguchi-Arigo SMM, Ariga H. Transcriptional Regulation of DJ-1. <i>Advances in experimental medicine and biology</i> . 2017;1037:89-95.                                                                                                                         |
| Unrelated study | 168 | Tang H. The effect of DJ-1 knockdown for the proliferation, migration and invasion in MGC 803 cells inhibited by diallyl disulfide, Nanhua university; 2016.                                                                                                                             |
| Unrelated study | 169 | Tanti GK, Pandey S, Goswami SK. SG2NA enhances cancer cell survival by stabilizing DJ-1 and thus activating Akt. <i>Biochemical and biophysical research communications</i> . 2015;463(4):524-531.                                                                                       |
| Unrelated study | 170 | Tillman JE, Yuan JL, Gu GY, et al. DJ-1 binds androgen receptor directly and mediates its activity in hormonally treated prostate cancer cells. <i>Cancer research</i> . 2007;67(10):4630-4637.                                                                                          |
| Unrelated study | 171 | Trivedi R, Dihazi GH, Eltoweissy M, Mishra DP, Mueller GA, Dihazi H. The antioxidant protein PARK7 plays an important role in cell resistance to Cisplatin-induced apoptosis in case of clear cell renal cell carcinoma. <i>European journal of pharmacology</i> . 2016;784:99-110.      |
| Unrelated study | 172 | Tsushima J, Nishimura K, Tashiro N, et al. Protective effect of planarian DJ-1 against 6-hydroxydopamine-induced neurotoxicity. <i>Neuroscience research</i> . 2012;74(3-4):277-283.                                                                                                     |
| Unrelated study | 173 | Usami Y, Hatano T, Imai S, et al. DJ-1 associates with synaptic membranes. <i>Neurobiology of disease</i> . 2011;43(3):651-662.                                                                                                                                                          |
| Unrelated study | 174 | van der Brug MP, Blackinton J, Chandran J, et al. RNA binding activity of the recessive parkinsonism protein DJ-1 supports involvement in multiple cellular pathways. <i>Proceedings of the National Academy of Sciences of the United States of America</i> . 2008;105(29):10244-10249. |
| Unrelated study | 175 | Vasseur S, Afzal S, Tardivel-Lacombe J, Park DS, Iovanna JL, Mak TW. DJ-1/PARK7 is an important mediator of hypoxia-induced cellular responses. <i>Proceedings of the National Academy of Sciences of the United States of America</i> . 2009;106(4):1111-1116.                          |
| Unrelated study | 176 | Vasseur S, Afzal S, Tomasini R, et al. Consequences of DJ-1 upregulation following p53 loss and cell transformation. <i>Oncogene</i> . 2012;31(5):664-670.                                                                                                                               |
| Unrelated study | 177 | Vavougiou G, Kerenidi T, Tsilioni I, Gourgoulianis K. The protein DJ-1 in malignant pleural effusions due to lung cancer: Levels and                                                                                                                                                     |

---

|                 |     |                                                                                                                                                                                                                                                                                                                      |
|-----------------|-----|----------------------------------------------------------------------------------------------------------------------------------------------------------------------------------------------------------------------------------------------------------------------------------------------------------------------|
| study           |     | correlations with oxidative stress biomarkers. <i>European Respiratory Journal</i> . 2013;42.                                                                                                                                                                                                                        |
| Unrelated study | 178 | Vavougiou GD, Solenov EI, Hatzoglou C, et al. Computational genomic analysis of PARK7 interactome reveals high BBS1 gene expression as a prognostic factor favoring survival in malignant pleural mesothelioma. <i>American journal of physiology Lung cellular and molecular physiology</i> . 2015;309(7):L677-686. |
| Unrelated study | 179 | Voros P, Sziksz E, Himer L, et al. Expression of PARK7 is increased in celiac disease. <i>Virchows Archiv</i> . 2013;463(3):401-408.                                                                                                                                                                                 |
| Unrelated study | 180 | Wang B, Qin H, Wang YJ, et al. Effect of DJ-1 overexpression on the proliferation, apoptosis, invasion and migration of laryngeal squamous cell carcinoma SNU-46 cells through PI3K/AKT/mTOR. <i>Oncology reports</i> . 2014;32(3):1108-1116.                                                                        |
| Unrelated study | 181 | Wang H, Gao W. DJ-1 Expression in Cervical Carcinoma and its Effects on Cell Viability and Apoptosis. <i>Medical science monitor : international medical journal of experimental and clinical research</i> . 2016;22:2943-2949.                                                                                      |
| Unrelated study | 182 | Wang J. Role of DJ-1 gene in tumors. <i>Journal of International Pathology and Clinical Medicine</i> . 2011(6):527-530.                                                                                                                                                                                              |
| Unrelated study | 183 | Wang W. The Expression and Significance of DJ-1 Protein in Ovarian Cancer. 2016.                                                                                                                                                                                                                                     |
| Unrelated study | 184 | Wang Y, Zhang Y, Lu Q, Wang Y, Sun X, Zhang S. NRG-1 Stimulates Serum DJ-1 Increase in Breast Cancers. <i>Pathology oncology research : POR</i> . 2017.                                                                                                                                                              |
| Unrelated study | 185 | Wang YD, Lu Q, Wang YM, Zhang S. NRG-1 stimulates DJ-1 secretion from human breast cancers by disassociation from HER3. <i>Acta Pharmacologica Sinica</i> . 2017;38(7):1080-1080.                                                                                                                                    |
| Unrelated study | 186 | Wei W, Tang C, Zhan X, Yi H, Li C. Effect of DJ-1 siRNA on biological behavior of human lung squamous carcinoma SK-MES-1 cells. <i>Zhong nan da xue xue bao Yi xue ban = Journal of Central South University Medical sciences</i> . 2013;38(1):7-13.                                                                 |
| Unrelated study | 187 | Wei W. The progress in the gene of DJ-1. <i>Chinese Journal of Doctors</i> . 2013(11):1579-1581.                                                                                                                                                                                                                     |
| Unrelated study | 188 | Wei w. The Role of DJ-1 Gene in Lung Cancer and Analysis of Its Interaction Protein [Master], Zhongnan University; 2013.                                                                                                                                                                                             |
| Unrelated study | 189 | Weiming Wang HL, Jinjin Qin, Qun Zuo, et al. Expression and relationship of DJ-1 protein in serum and tissue of epithelial ovarian tumor. <i>China Journal of Modern Medicine</i> . 2015(14):30-34.                                                                                                                  |

---



---

|                 |     |                                                                                                                                                                                                                                                                                                                                                |
|-----------------|-----|------------------------------------------------------------------------------------------------------------------------------------------------------------------------------------------------------------------------------------------------------------------------------------------------------------------------------------------------|
| Unrelated study | 190 | Wilson MA. The Role of Cysteine Oxidation in DJ-1 Function and Dysfunction. <i>Antioxidants &amp; redox signaling</i> . 2011;15(1):111-122.                                                                                                                                                                                                    |
| Unrelated study | 191 | Xing X. The expression and significance of DJ-1 and PTEN in chronic kidney disease [Master], Taishan Medical University; 2011.                                                                                                                                                                                                                 |
| Unrelated study | 192 | Xiong H, Wang D, Chen L, et al. Parkin, PINK1, and DJ-1 form a ubiquitin E3 ligase complex promoting unfolded protein degradation. <i>The Journal of clinical investigation</i> . 2009;119(3):650-660.                                                                                                                                         |
| Unrelated study | 193 | Xu Y. The Expression and Role of Oncogene DJ-1 in Gastric Cancer Stem Cells. 2015.                                                                                                                                                                                                                                                             |
| Unrelated study | 194 | Xuan Zhu SX. High expression of DJ-1 protein related to poor prognosis in sporadic breast cancer. <i>Chinese Journal of Breast Disease(Electronic Version)</i> . 2014(03):170-175.                                                                                                                                                             |
| Unrelated study | 195 | Xueping Feng ZC, Zhiqiang Xiao, et al Over Expression of NM23-H1、 DJ1 and TIM1 in Poor Differential Nasopharyngeal Carcinoma Tissues and CNE2 Cell Line. <i>PROGRESS IN BIOCHEMISTRY AND BIOPHYSICS</i> . 2005(4):338-346.                                                                                                                     |
| Unrelated study | 196 | Yamane T, Kato-Ose I, Sakamoto T, Nakano Y. Secretion of Legumain Increases in Conditioned Medium from DJ-1-Knockout Cells and in Serum from DJ-1-Knockout Mice. <i>The open biochemistry journal</i> . 2018;12:29-35.                                                                                                                         |
| Unrelated study | 197 | Yamane T, Kozuka M, Yamamoto Y, et al. Protease activity of legumain is inhibited by an increase of cystatin E/M in the DJ-1-knockout mouse spleen, cerebrum and heart. <i>Biochemistry and biophysics reports</i> . 2017;9:187-192.                                                                                                           |
| Unrelated study | 198 | Yamane T, Suzui S, Kitaura H, Takahashi-Niki K, Iguchi-Arigo SMM, Ariga H. Transcriptional Activation of the Cholecystokinin Gene by DJ-1 through Interaction of DJ-1 with RREB1 and the Effect of DJ-1 on the Cholecystokinin Level in Mice. <i>PloS one</i> . 2013;8(11).                                                                    |
| Unrelated study | 199 | Yamane T, Yamamoto Y, Nakano Y, Nakagaki T, Ohkubo I, Ariga H. Expression and protease activity of mouse legumain are regulated by the oncogene/transcription co-activator, DJ-1 through p53 and cleavage of annexin A2 is increased in DJ-1-knockout cells. <i>Biochemical and biophysical research communications</i> . 2015;467(3):472-477. |
| Unrelated study | 200 | Yanagida T, Kitamura Y, Yamane K, et al. Protection against oxidative stress-induced neurodegeneration by a modulator for DJ-1, the wild-type of familial Parkinson's disease-linked PARK7. <i>Journal of pharmacological sciences</i> . 2009;109(3):463-468.                                                                                  |
| Unrelated study | 201 | Yang k. The progress in DJ-1 <i>JOURNAL OF XINXIANG MEDICAL COLLEGE</i> . 2010(02):211-214.                                                                                                                                                                                                                                                    |

---

---

|                 |     |                                                                                                                                                                                                                                                                           |
|-----------------|-----|---------------------------------------------------------------------------------------------------------------------------------------------------------------------------------------------------------------------------------------------------------------------------|
| Unrelated study | 202 | Ying Zhang WL, Chunxin Chi. Expression of Human DJ-1 Protein in Human Umbilical Vein Endothelial Cells and Its Antioxidative Protection. MEDICAL JOURNAL OF CHINESE PEOPLE'S LIBERATION ARMY. 2008(12):1498-1499.                                                         |
| Unrelated study | 203 | Yokota T, Sugawara K, Ito K, Takahashi R, Ariga H, Mizusawa H. Down regulation of DJ-1 enhances cell death by oxidative stress, ER stress, and proteasome inhibition. Biochemical and biophysical research communications. 2003;312(4):1342-1348.                         |
| Unrelated study | 204 | Yongrong Zhong SX, Yanfei Cheng, et al. Construction of DJ-1 eukaryotic expression vector and identification of transfected oral cancer cell line. Journal of Jinan University (Natural Science & Medicine Edition). 2013(04):401-404.                                    |
| Unrelated study | 205 | Yu D, Pan HX, Zhang RG, Li Y, Nie X. Nucleus DJ-1/Park7 acts as a favorable prognostic factor and involves mucin secretion in invasive breast carcinoma in Chinese population. International Journal of Clinical and Experimental Medicine. 2017;10(4):6558-6567.         |
| Unrelated study | 206 | Yu H, Waddell JN, Kuang S, Bidwell CA. Park7 expression influences myotube size and myosin expression in muscle. PloS one. 2014;9(3):e92030.                                                                                                                              |
| Unrelated study | 207 | Yu H. The Study of the Protective Effect of Stable and High DJ-1 Expression on Oxidative Stress Injury in H9c2 Myocardial Cells Induced by Ischemia/Reperfusion [master], Nanchang university; 2013.                                                                      |
| Unrelated study | 208 | Zhang DH, Lim SG, Koay ESC. Proteomic identification of down-regulation of oncoprotein DJ-1 and proteasome activator subunit 1 in hepatitis B virus-infected well-differentiated hepatocellular carcinoma. International journal of oncology. 2007;31(3):577-584.         |
| Unrelated study | 209 | Zhang GQ, He C, Tao L, Liu F. Role of DJ-1 siRNA in reverse sensitivity of breast cancer cells to chemotherapy and its possible mechanism. International journal of clinical and experimental pathology. 2015;8(6):6944-6951.                                             |
| Unrelated study | 210 | Zhang S, Mukherjee S, Fan XJ, et al. Novel association of DJ-1 with HER3 potentiates HER3 activation and signaling in cancer. Oncotarget. 2016;7(40):65758-65769.                                                                                                         |
| Unrelated study | 211 | Zhang Y, Gong XG, Wang ZZ, et al. Protective effects of DJ-1 mediated Akt phosphorylation on mitochondrial function are promoted by Da-Bu-Yin-Wan in 1-methyl-4-phenylpyridinium-treated human neuroblastoma SH-SY5Y cells. Journal of ethnopharmacology. 2016;187:83-93. |
| Unrelated study | 212 | Zhao G. Expression of DJ-1 Gene in Multiple Myeloma Cells and Its Clinical Significance [Master], Chuanbei medical school; 2017.                                                                                                                                          |
| Unrelated study | 213 | Zhisen Shen HD, Dong Ye, et al. Effect of DJ-1 silencing by RNA interference on growth of xenografted human laryngeal squamous cell carcinoma Hep-2 cells in nude mice. Journal of Zhejiang University (Medical Science). 2016(4):349-355.                                |

---

|                 |     |                                                                                                                                                                                                                                                            |
|-----------------|-----|------------------------------------------------------------------------------------------------------------------------------------------------------------------------------------------------------------------------------------------------------------|
| Unrelated study | 214 | Zhongqing Xiao SL, Qizhou Zhu, et al. Effect of Silencing DJ-1 Gene Expression on Proliferation and Apoptosis of Endometrial Carcinoma Cell Line Ishikawa. <i>Tumor</i> . 2014(10):924-928.                                                                |
| Unrelated study | 215 | Zhou M. Parkin/DJ-1-mediated mitochondrial autophagy plays a role in the reduction of focal cerebral ischemia-reperfusion injury in rats after remote ischemic postconditioning [doctor], Wuhan university; 2016.                                          |
| Unrelated study | 216 | Zhou Y, Shi X, Chen H, et al. DJ-1/Park7 Sensitive Na(+)/H(+) Exchanger 1 (NHE1) in CD4(+) T Cells. <i>Journal of cellular physiology</i> . 2017;232(11):3050-3059.                                                                                        |
| Unrelated study | 217 | Zhu H, Liao SD, Shi JJ, et al. DJ-1 mediates the resistance of cancer cells to dihydroartemisinin through reactive oxygen species removal. <i>Free Radical Biology and Medicine</i> . 2014;71:121-132.                                                     |
| Unrelated study | 218 | Zhu X. Expression of DJ-1 in laryngeal carcinoma and RNA interference DJ-1 gene inhibition Hep-2 cell proliferation. 2008.                                                                                                                                 |
| Unrelated study | 219 | Zhu XL, Sun W, Lei WB, Zhuang HW, Hou WJ, Wen WP. DJ-1-induced phosphatase and tensin homologue downregulation is associated with proliferative and invasive activity of laryngeal cancer cells. <i>Molecular medicine reports</i> . 2015;12(2):2003-2008. |
| Unrelated study | 220 | Zhu Z. DJ-1 Promotes Invasion and Migration of Gastric Carcinoma Cells and Its Mechanism. 2014.                                                                                                                                                            |
| Unrelated study | 221 | Zhu ZM, Li ZR, Huang Y, et al. DJ-1 is involved in the peritoneal metastasis of gastric cancer through activation of the Akt signaling pathway. <i>Oncology reports</i> . 2014;31(3):1489-1497.                                                            |
| Unrelated study | 222 | Zucchelli S, Vilotti S, Calligaris R, et al. Aggresome-forming TTRAP mediates pro-apoptotic properties of Parkinson's disease-associated DJ-1 missense mutations. <i>Cell death and differentiation</i> . 2009;16(3):428-438.                              |
| Unrelated study | 223 | Davidson B, Hadar R, Schlossberg A, et al. Expression and clinical role of DJ-1, a negative regulator of PTEN, in ovarian carcinoma. <i>Human Pathology</i> . 2008;39(1):87-95.                                                                            |
| Unrelated study | 224 | Fang M, Zhong XY, Du B, et al. Role of DJ-1-induced PTEN down-regulation in migration and invasion of human glioma cells. <i>Chinese journal of cancer</i> . 2010;29(12):988-994.                                                                          |
| Unrelated study | 225 | Liu QX, Zheng H, Deng XF, Zhou D, Dai JG. Status of the Parkinson's disease gene family expression in non-small-cell lung cancer. <i>World journal of surgical oncology</i> . 2015;13.                                                                     |
| Unrelated study | 226 | Miyajima Y, Sato Y, Oka H, et al. Prognostic significance of nuclear DJ-1 expression in astrocytoma. <i>Anticancer research</i> . 2010;30(1):265-269.                                                                                                      |

|                    |     |                                                                                                                                                                                                                                              |
|--------------------|-----|----------------------------------------------------------------------------------------------------------------------------------------------------------------------------------------------------------------------------------------------|
| Unrelated<br>study | 227 | Zeng HZ, Qu YQ, Zhang WJ, Xiu B, Deng AM, Liang AB. Proteomic analysis identified DJ-1 as a cisplatin resistant marker in non-small cell lung cancer. <i>International journal of molecular sciences</i> . 2011;12(6):3489-3499.             |
| Unrelated<br>study | 228 | Abd El Atti RM, Abou Gabal HH, Osman WM, Saad AS. Insights into the prognostic value of DJ-1 and MIB-1 in astrocytic tumors. <i>Diagnostic pathology</i> . 2013;8:126.                                                                       |
| Data<br>Deficient  | 1   | Bande MF, Santiago M, Blanco MJ, et al. Serum DJ-1/PARK 7 is a potential biomarker of choroidal nevi transformation. <i>Investigative ophthalmology &amp; visual science</i> . 2012;53(1):62-67.                                             |
| Data<br>Deficient  | 2   | Gao HY, Niu YC, Li M, Fang S, Guo LL. Identification of DJ-1 as a contributor to multidrug resistance in human small-cell lung cancer using proteomic analysis. <i>International journal of experimental pathology</i> . 2017;98(2):67-74.   |
| Data<br>Deficient  | 3   | Han BB, Wang JW, Gao J, et al. DJ-1 as a potential biomarker for the early diagnosis in lung cancer patients. <i>Tumor Biology</i> . 2017;39(6):1-7.                                                                                         |
| Data<br>Deficient  | 4   | He X. The expression of DJ-1 in pancreatic cancer and the mechanisms of its effect on metastasis of pancreatic cancer progression. 2011. <b>[PHD]</b> . Shanghai Jiaotong University                                                         |
| Data<br>Deficient  | 5   | Hintsala HR, Soini Y, Haapasaaari KM, Karihtala P. Dysregulation of redox-state-regulating enzymes in melanocytic skin tumours and the surrounding microenvironment. <i>Histopathology</i> . 2015;67(3):348-357.                             |
| Data<br>Deficient  | 6   | Li Hai ZH, Du Zhenxian, Deng Weiwei Expression of DJ-1 and Its Significance in Thyroid Cancer. <i>JOURNAL OF CHINA MEDICAL UNIVERSITY</i> . 2010(07):549-551.                                                                                |
| Data<br>Deficient  | 7   | Liu S. The Role and Mechanism of Oncogene DJ-1 in Human Hepatocellular Carcinoma. 2011. <b>[PHD]</b> .Huazhong University of Science and Technology                                                                                          |
| Data<br>Deficient  | 8   | Loran OB, Veliev EI, Okhrits VE, et al. Potential clinical value of circulating DJ-1 in patients with prostate cancer <i>European Urology Supplements</i> . 2010;9(2):309-309.                                                               |
| Data<br>Deficient  | 9   | Merikallio H, Paakko P, Kinnula VL, Harju T, Soini Y. Nuclear factor erythroid-derived 2-like 2 (Nrf2) and DJ1 are prognostic factors in lung cancer. <i>Human Pathology</i> . 2012;43(4):577-584.                                           |
| Data<br>Deficient  | 10  | Osman WM, Abd El Atti RM, Abou Gabal HH. DJ-1 and androgen receptor immunohistochemical expression in prostatic carcinoma: a possible role in carcinogenesis. <i>Journal of the Egyptian National Cancer Institute</i> . 2013;25(4):223-230. |
| Data<br>Deficient  | 11  | Qiu B, Wang J, Yu Y, et al. DJ-1 promotes development of DEN-induced hepatocellular carcinoma and proliferation of liver cancer cells. <i>Oncotarget</i> . 2017;8(5):8499-8511.                                                              |

|           |    |                                                                                                                                                                                                                                                             |
|-----------|----|-------------------------------------------------------------------------------------------------------------------------------------------------------------------------------------------------------------------------------------------------------------|
| Data      | 12 | Soini Y, Eskelinen M, Juvonen P, et al. Nuclear Nrf2 expression is related to a poor survival in pancreatic adenocarcinoma. <i>Pathology, research and practice</i> . 2014;210(1):35-39.                                                                    |
| Deficient |    |                                                                                                                                                                                                                                                             |
| Data      | 13 | Tian M, Cui YZ, Song GH, et al. Proteomic analysis identifies MMP-9, DJ-1 and A1BG as overexpressed proteins in pancreatic juice from pancreatic ductal adenocarcinoma patients. <i>BMC cancer</i> . 2008;8:241.                                            |
| Deficient |    |                                                                                                                                                                                                                                                             |
| Data      | 14 | Weihong Zeng DH, Mao Fang. Four Kinds of Common Tumors Serum Concentrations of DJ-1 Protein and Its Significance. <i>Medical Information</i> . 2013(15):55.                                                                                                 |
| Deficient |    |                                                                                                                                                                                                                                                             |
| Data      | 15 | Weiming Wang HL, Zhihui Cai ,et al. The Expression and Significance of DJ-1 Protein in Ovarian Cancer. <i>Maternal &amp; Child Health Care of China</i> . 2014(14):2243-2245.                                                                               |
| Deficient |    |                                                                                                                                                                                                                                                             |
| Data      | 16 | Yuanhong Huang XH. The Detection of DJ-1 protein in serum in primary liver cancer patients. <i>Contemporary Medicine</i> . 2013(01):44-45.                                                                                                                  |
| Deficient |    |                                                                                                                                                                                                                                                             |
| Data      | 17 | Zhang HJ, Siu MKY, Jiang LL, Mak VCY, Ngan HYS, Cheung ANY. Overexpression of the Parkinson Disease Protein DJ-1 and its Regulator PTEN in Gestational Trophoblastic Disease. <i>International Journal of Gynecological Pathology</i> . 2010;29(5):468-475. |
| Deficient |    |                                                                                                                                                                                                                                                             |
| Data      | 18 | Zhang HY, Wang HQ, Liu HM, Guan Y, Du ZX. Regulation of tumor necrosis factor-related apoptosis-inducing ligand-induced apoptosis by DJ-1 in thyroid cancer cells. <i>Endocrine-related cancer</i> . 2008;15(2):535-544.                                    |
| Deficient |    |                                                                                                                                                                                                                                                             |
| Data      | 19 | Zhiying Zeng JZ, Qunfeng Zhang, et al. Elevated serum level of DJ-1 in malignant ovarian tumor and its clinical significance. <i>Progress in Obstetrics and Gynecology</i> . 2016(6):429-432,436.                                                           |
| Deficient |    |                                                                                                                                                                                                                                                             |
| n<50      | 1  | Cao Yin SX, Lijia Shen, et al. Detection of DJ-1 and PTEN in Oral Squamous Cell Carcinoma and Precancerous Lesions. <i>Journal of Dental Prevention &amp; Treatment</i> . 2011(11):563-567.                                                                 |
| n<50      | 2  | Chen W, Shi X, Liu Y, Li C, Xiao Z, Liu Z. Differential expression of DJ-1 and HSP27 in invasive and non-invasive pituitary adenomas. <i>Zhong nan da xue xue bao Yi xue ban</i> . 2012;37(5):481-484.                                                      |
| n<50      | 3  | He XY, Liu BY, Yao WY, et al. Serum DJ-1 as a diagnostic marker and prognostic factor for pancreatic cancer. <i>Journal of digestive diseases</i> . 2011;12(2):131-137.                                                                                     |
| n<50      | 4  | Jin Z. Investigate expression effect and its significance of oncogene DJ-1 in thyroid carcinoma. <i>World Latest Medicine Information</i> . 2015(32):11-12.                                                                                                 |
| n<50      | 5  | MARJO PYLVÄS-EEROLA AL, ULLA PUISTOLA, JUSSI KOIVUNEN and PEETER KARIHTALA. Cancer Stem Cell Properties as Factors Predictive of Chemoresistance in Neoadjuvantlytreated Patients with Ovarian Cancer. <i>Anticancer research</i> . 2016;36:3425-           |

---

|      |    |                                                                                                                                                                                                                                                                    |
|------|----|--------------------------------------------------------------------------------------------------------------------------------------------------------------------------------------------------------------------------------------------------------------------|
|      |    | 3432.                                                                                                                                                                                                                                                              |
| n<50 | 6  | Tsiaousidou A, Lambropoulou M, Chatzitheoklitos E, et al. B7H4, HSP27 and DJ-1 molecular markers as prognostic factors in pancreatic cancer. <i>Pancreatology : official journal of the International Association of Pancreatology (IAP)</i> . 2013;13(6):564-569. |
| n<50 | 7  | Vavougiou G, Kerenidi T, Tsilioni I, Zarogiannis SG, Gourgoulialis KI. Pleural effusion levels of DJ-1 are increased in elderly lung cancer patients with malignant pleural effusions. <i>Redox Report</i> . 2015;20(6):254-258.                                   |
| n<50 | 8  | Hui Liu, WW, Zhihui Cai ,et al. Expression and Clinic Significance of Serum DJ-1 in Ovarian Cancer. <i>Tianjin Medical Journal</i> . 2014(09):920-922.                                                                                                             |
| n<50 | 9  | Wu Fang LY, Huang Zhiming. The expression of DJ-1 gene in human hepatocellular carcinoma and its relationship with tumor invasion and metastasis. <i>Chin J Hepatol</i> . 2009;17(3):203-206.                                                                      |
| n<50 | 10 | Xiaoqing Lai ZL, Fan Zhang. Expression of DJ-1 and HSP27 Proteins in Epithelial Ovarian Cancer and Their Correlation with Tumor Invasion and Metastasis. <i>Modern diagnosis and treatment</i> . 2016(07):1314-1315.                                               |
| n<50 | 11 | Chen LL, Tian JJ, Su L, et al. DJ-1: a promising marker in metastatic uveal melanoma. <i>Journal of cancer research and clinical oncology</i> . 2015;141(2):315-321.                                                                                               |
| n<50 | 12 | Zhang Z. A study on human laryngeal squamous cell carcinoma derived proteom and the tumor marker discovery. [PHD] Peking Union Medical College Hospital. 2011.                                                                                                     |
| n<50 | 13 | Zhou B. Clinical Pathological Features and Prognostic Analysis of Pancreatic Neuroendocrine Tumors, [PHD] zhejiang university; 2016.                                                                                                                               |

---

**Abbreviation:** wos, Web of Science; CNKI, China National Knowledge Infrastructure; wf, Wanfang databases
